# Supplementary material for: Evidence of cryptic introgression in tomato (Solanum lycopersicum L.) based on wild tomato species alleles
Source: PubMed Central journal article supplement (PMC3462117; doi:10.1186/1471-2229-12-133), 2012-08-07

LeSNP1  
437\_2

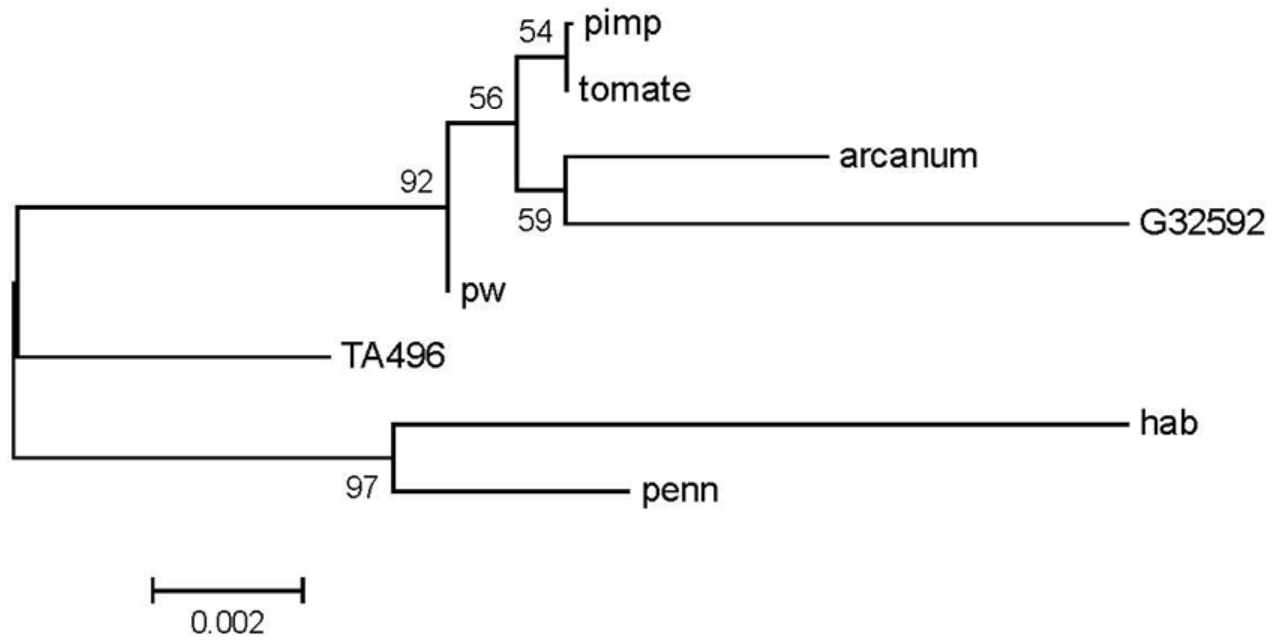

LeSNP3  
3300\_2

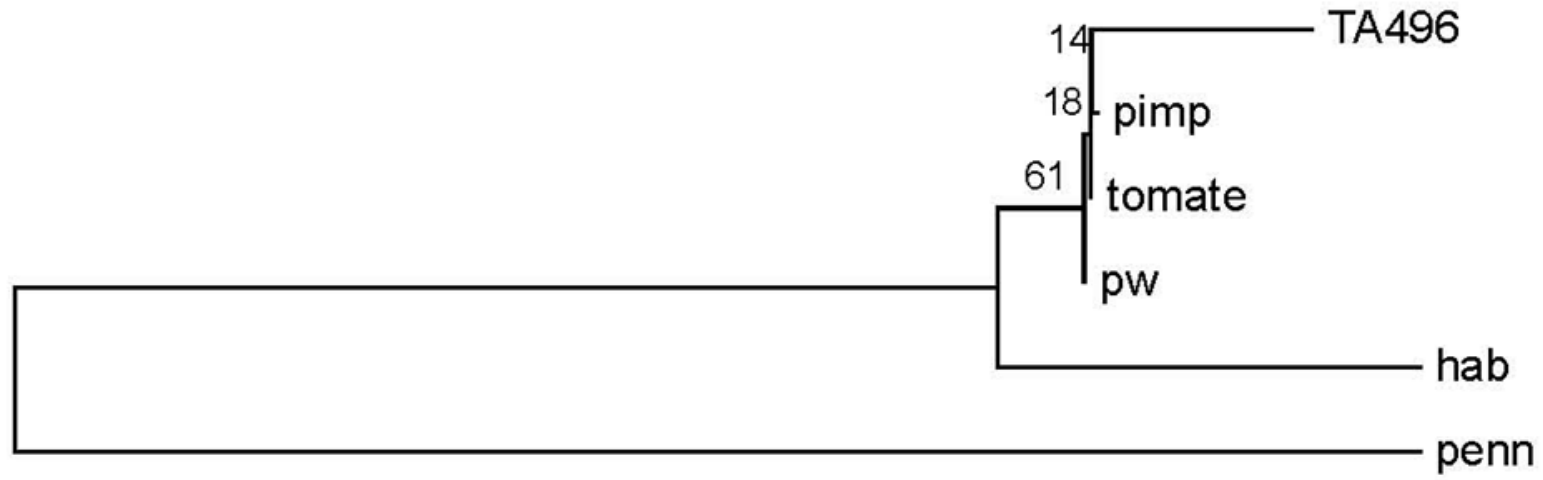

LeSNP4  
4301\_3

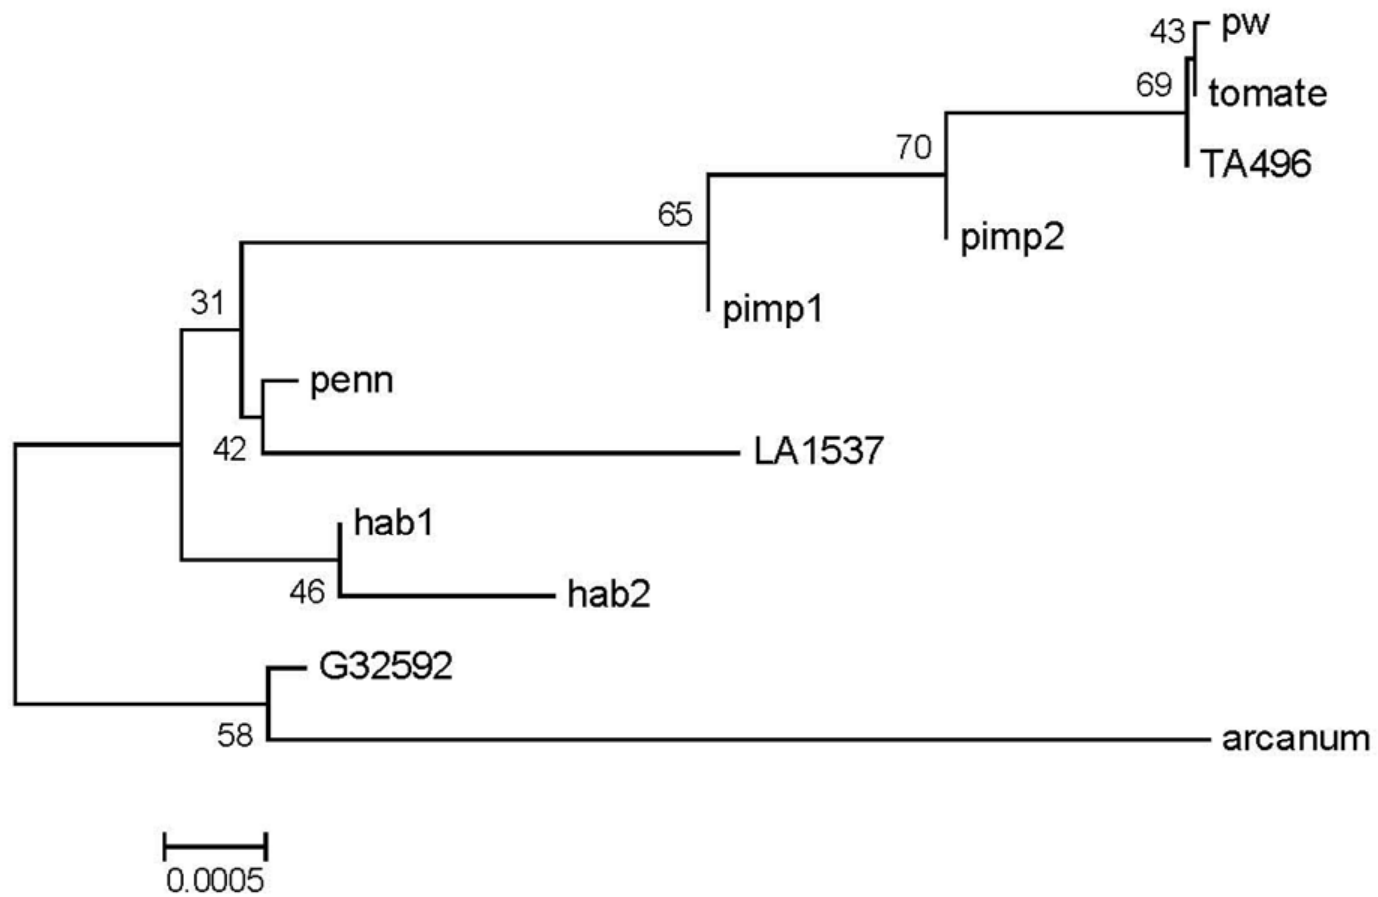

LeSNP5  
3155\_3

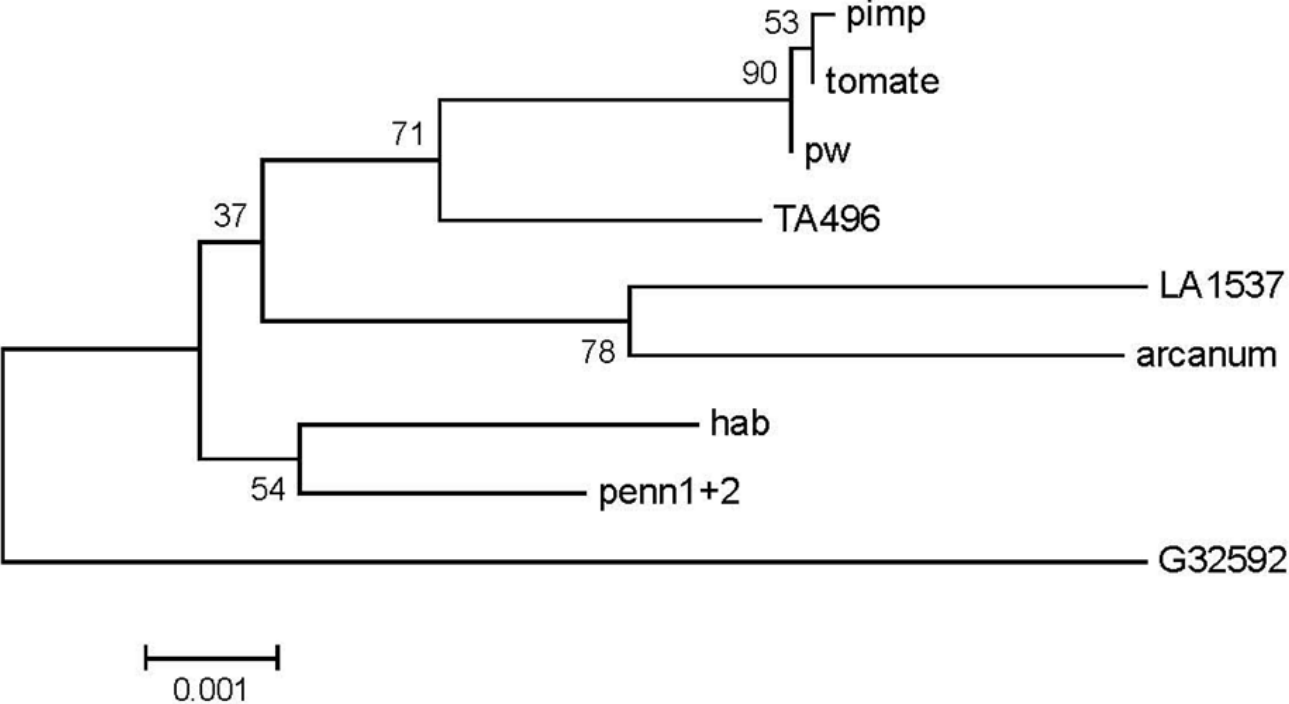

LeSNP6  
1260\_2

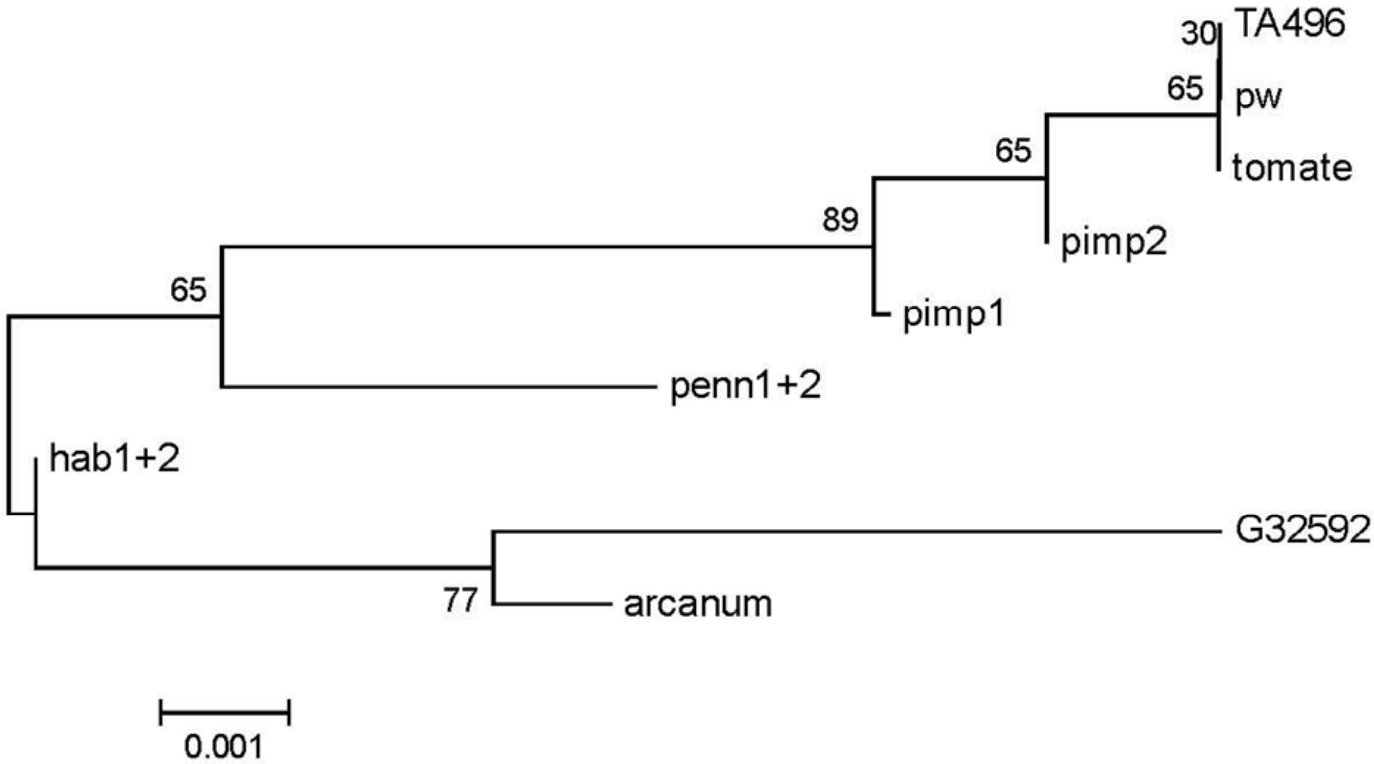

LeSNP7  
3332\_3

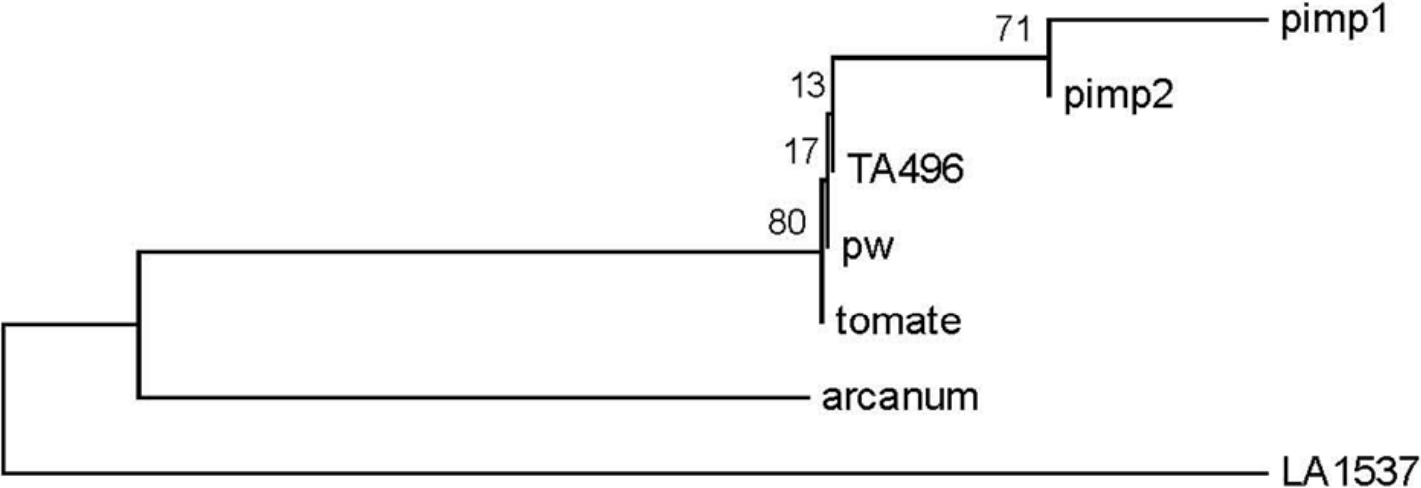

0.005

LeSNP9b  
2534\_1b

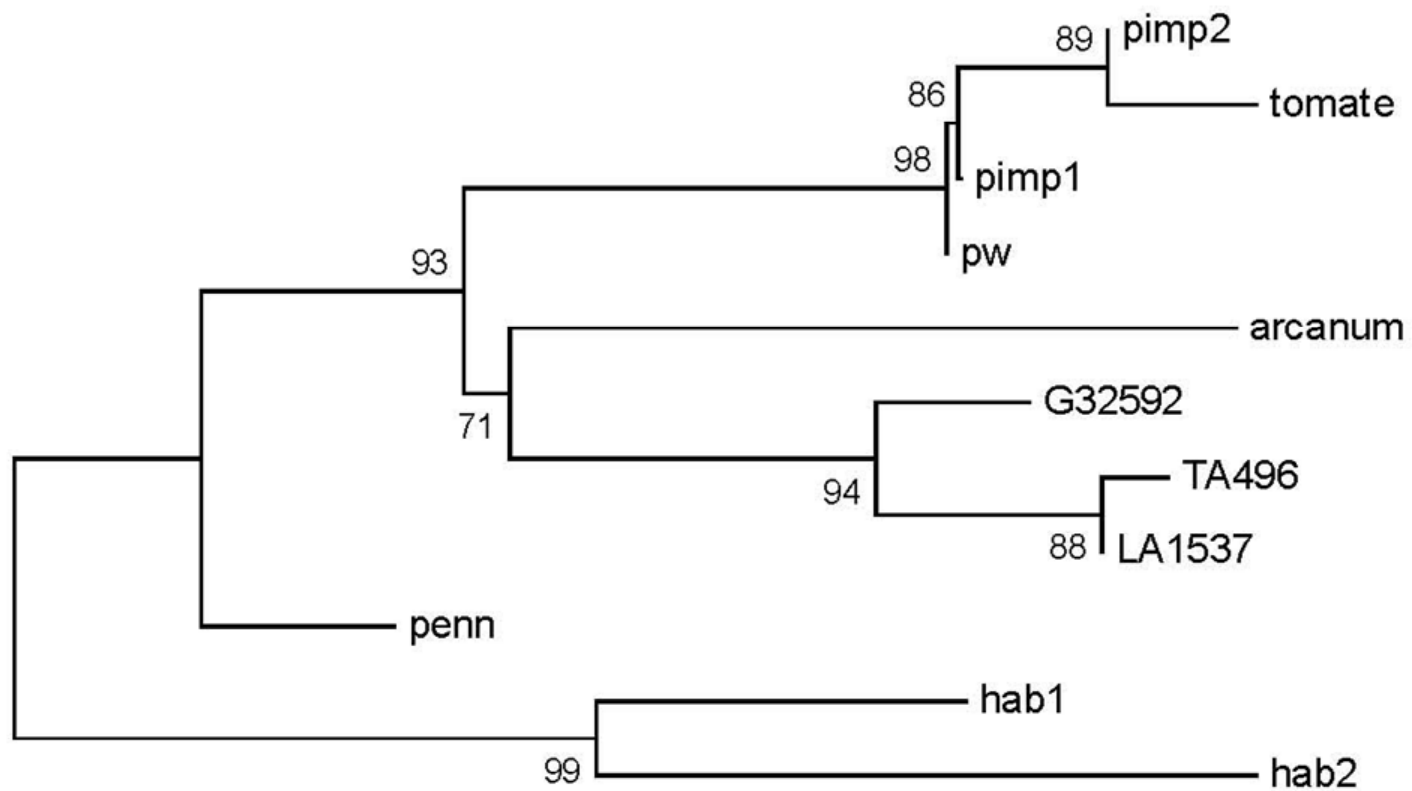

0.002

LeSNP10  
2325\_3

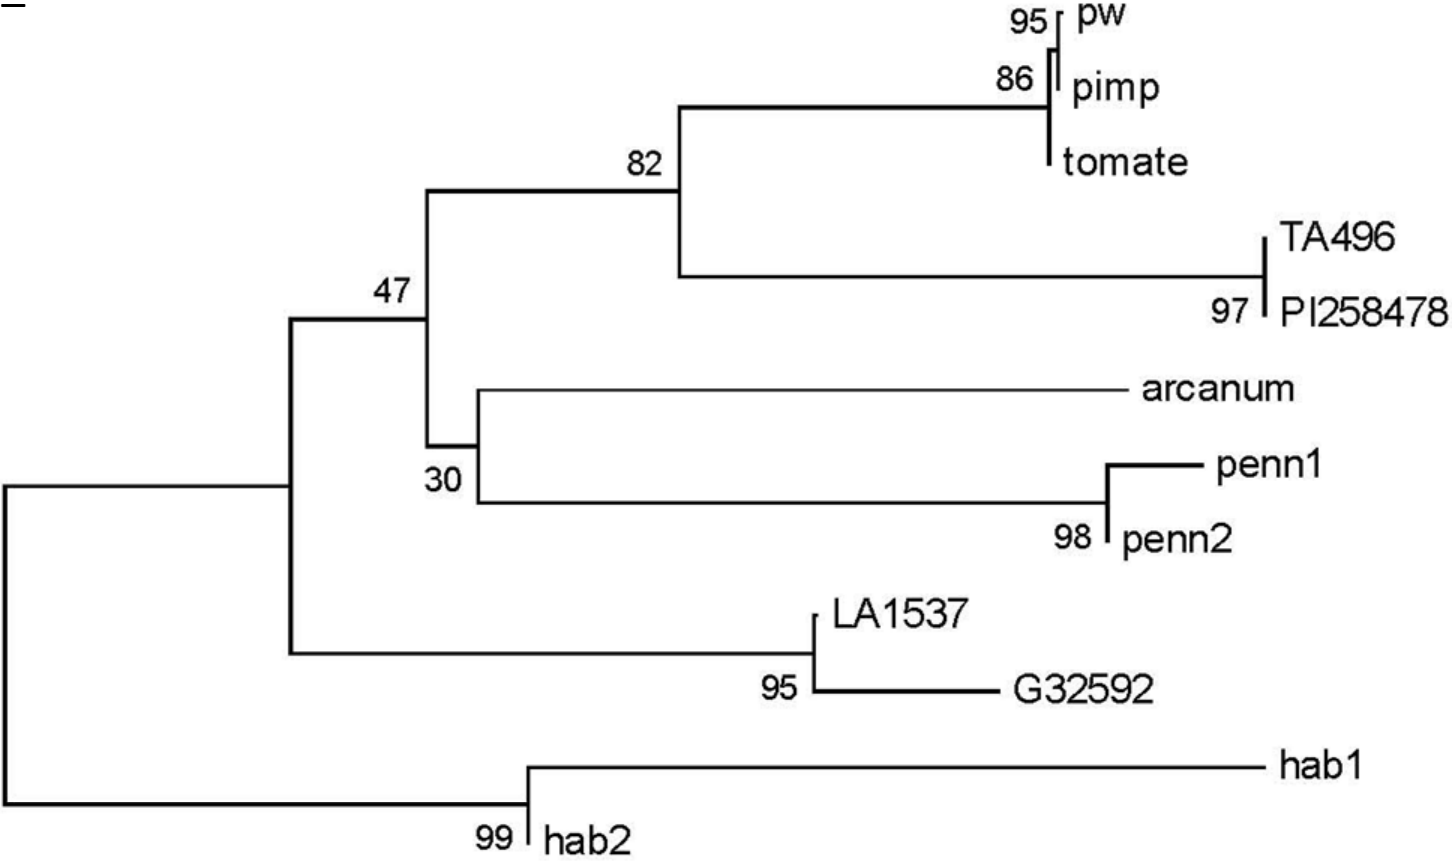

0.002



LeSNP13  
1287\_1

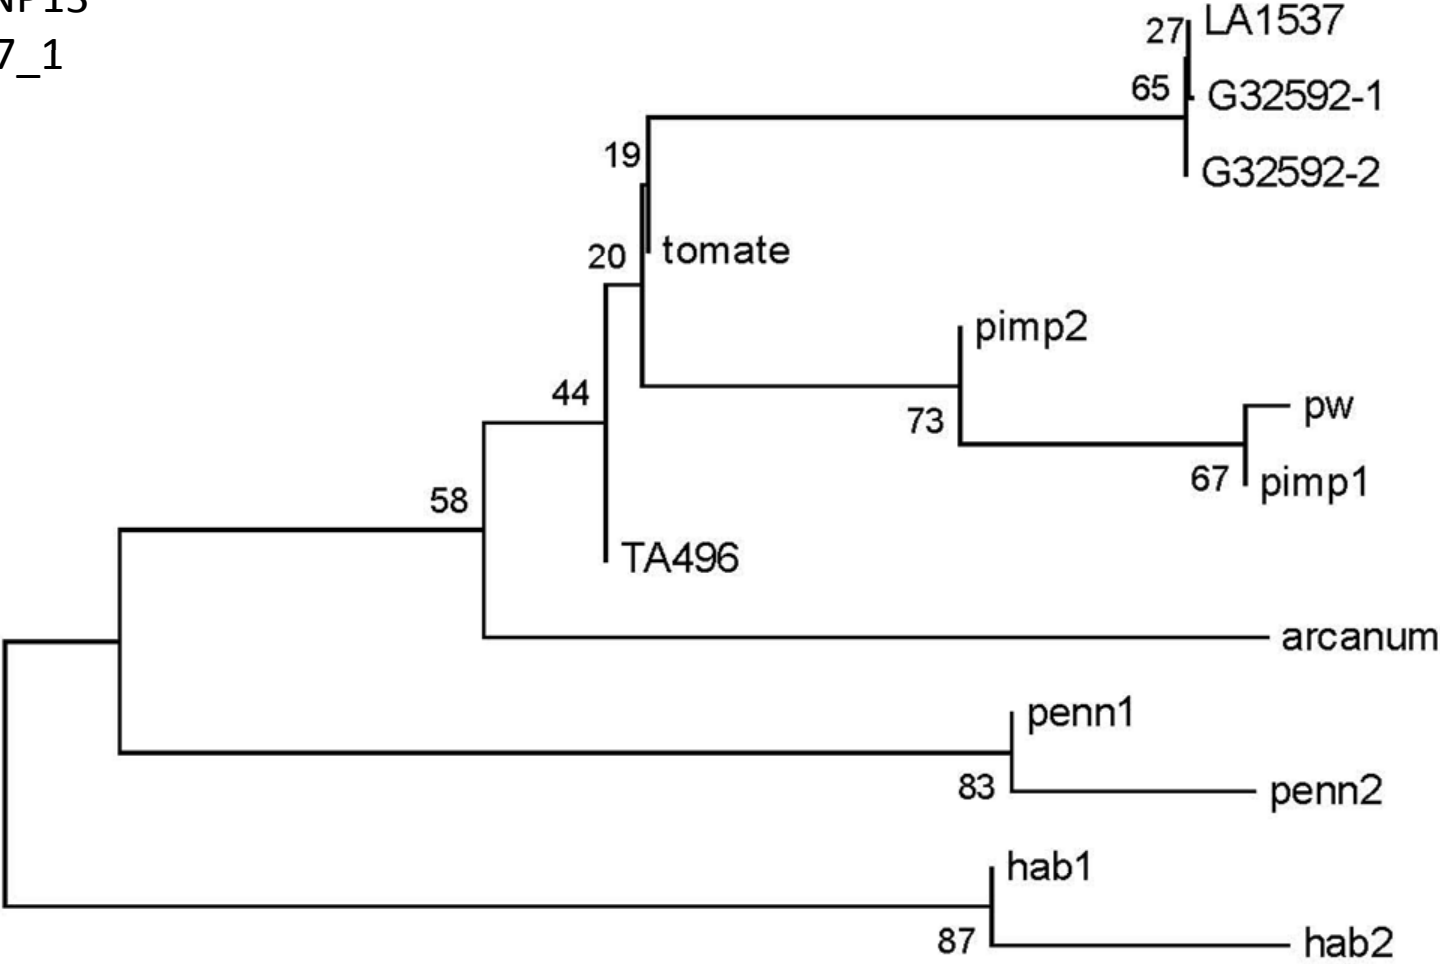

0.005

LeSNP16  
1589\_1

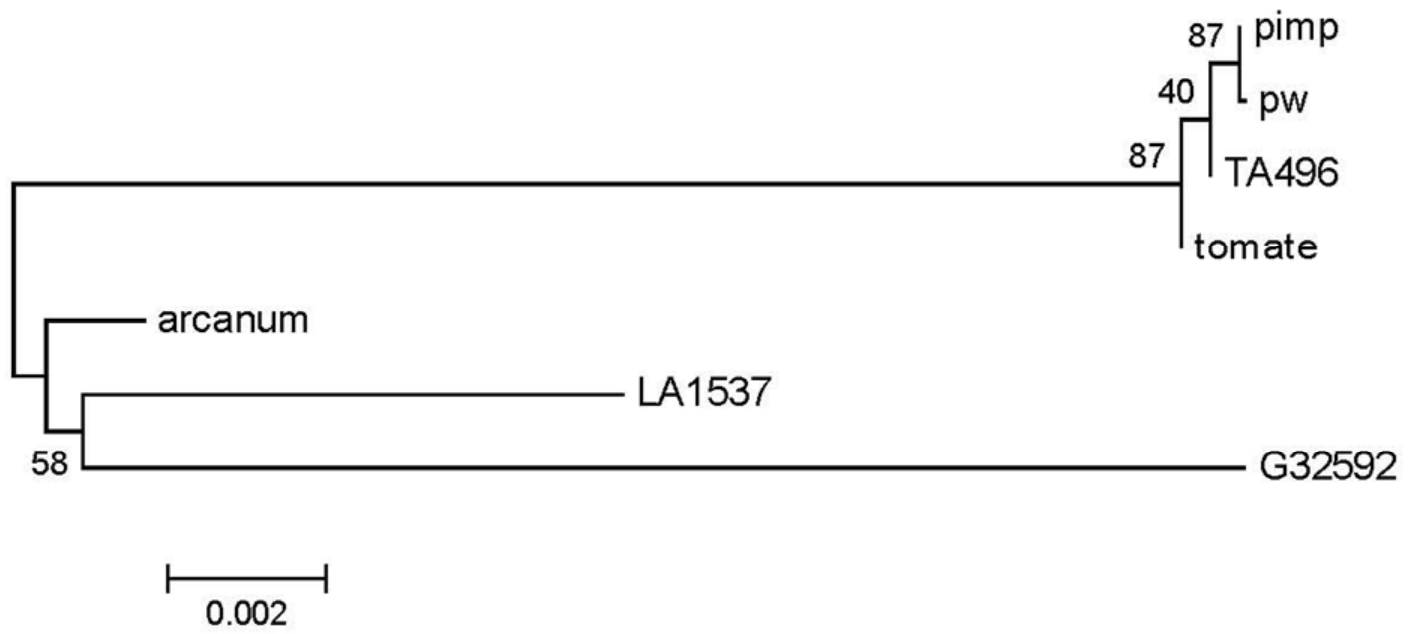

LeSNP17  
1675\_1

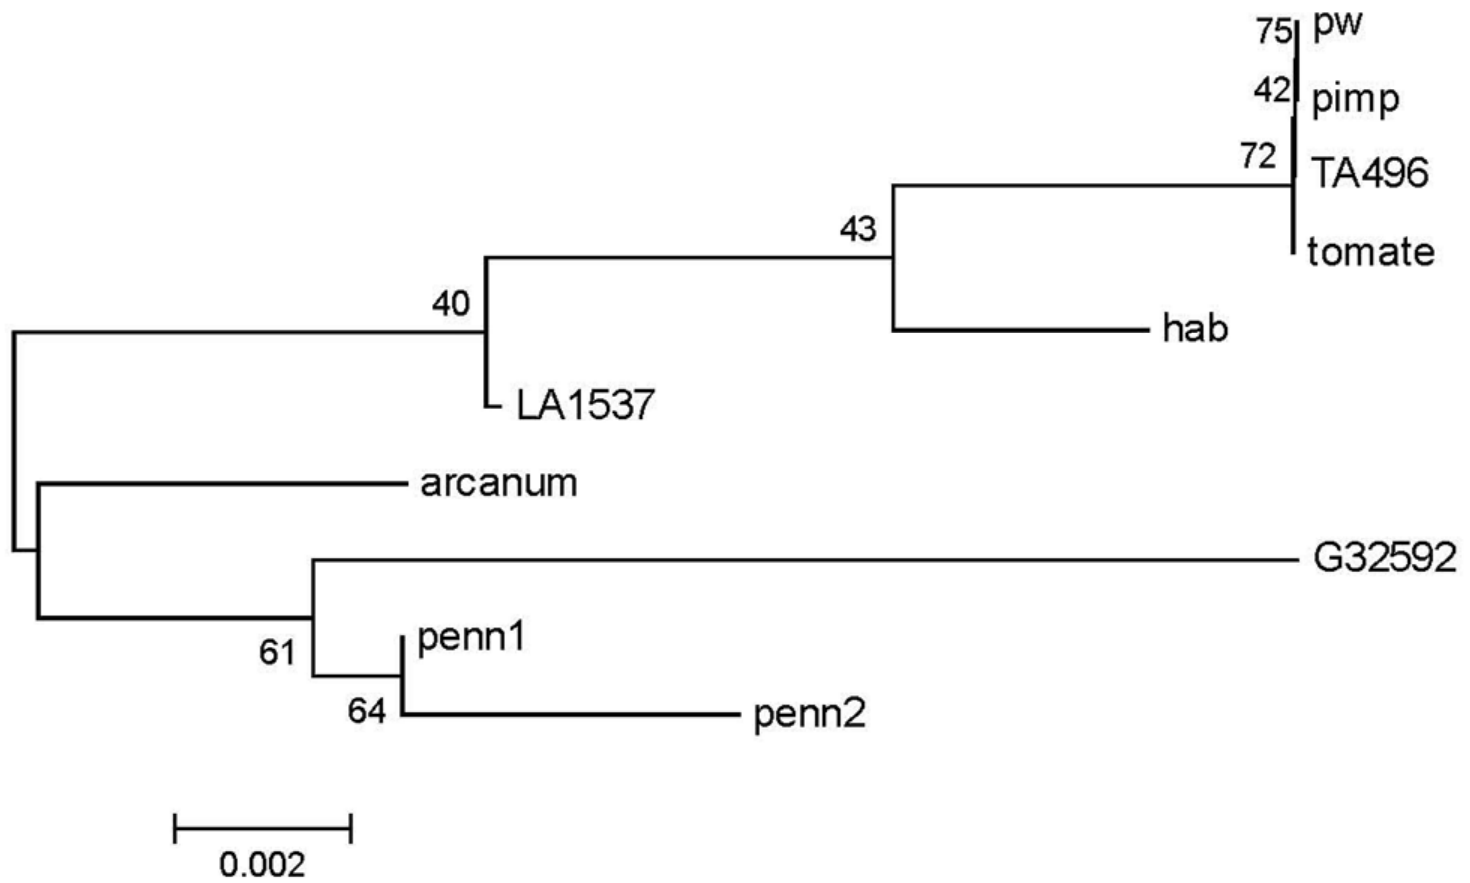

LeSNP19  
1724\_1

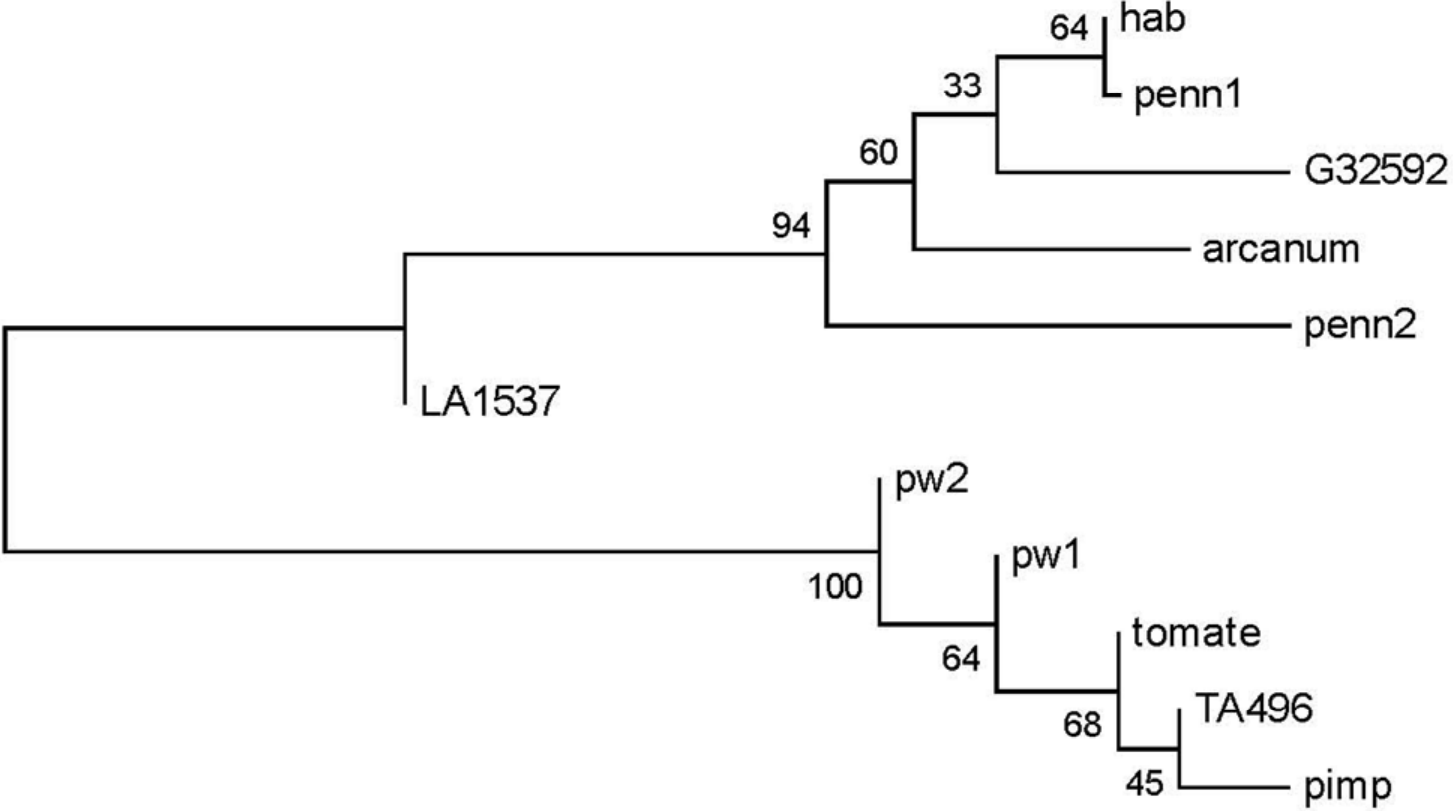

0.005

LeSNP21  
1863\_3

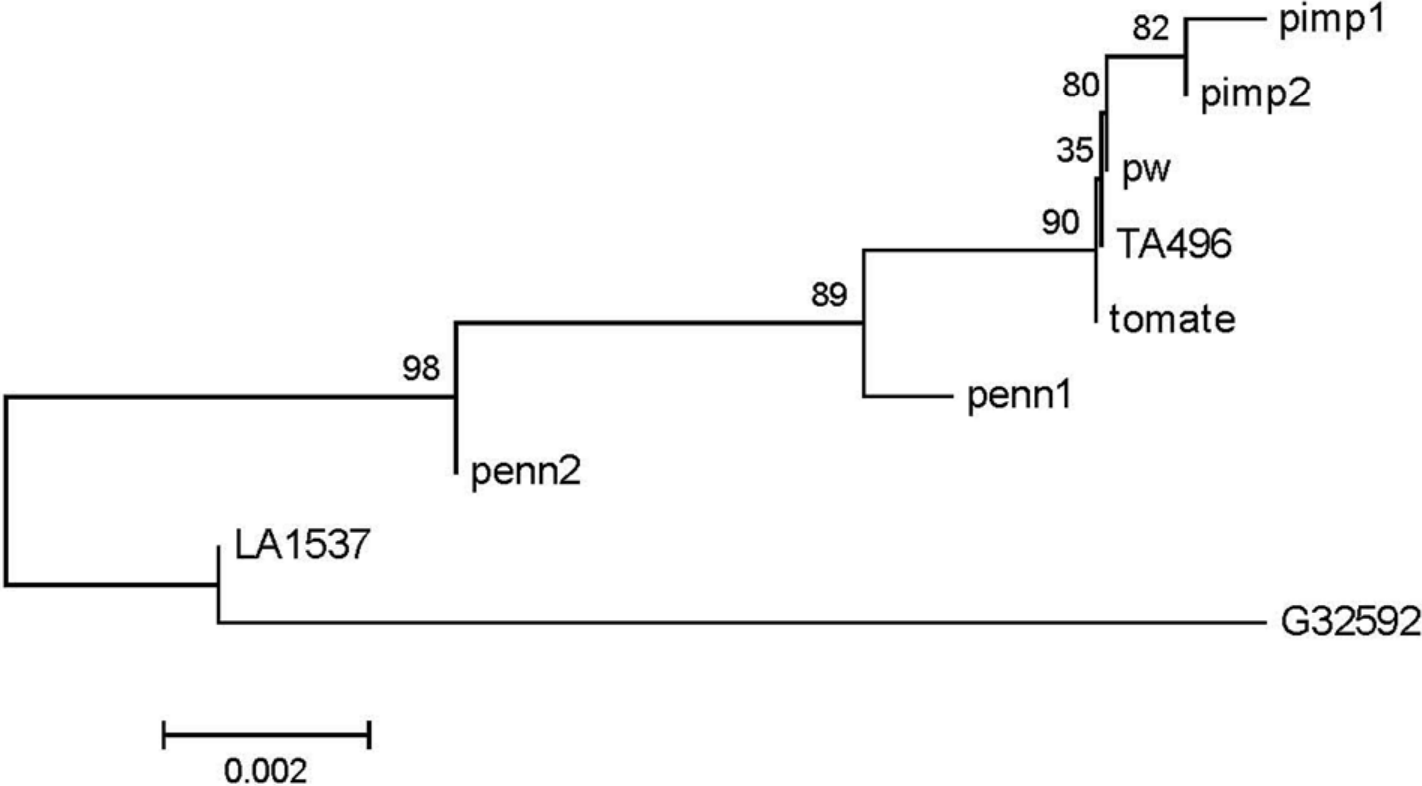

LeSNP24  
2189\_1

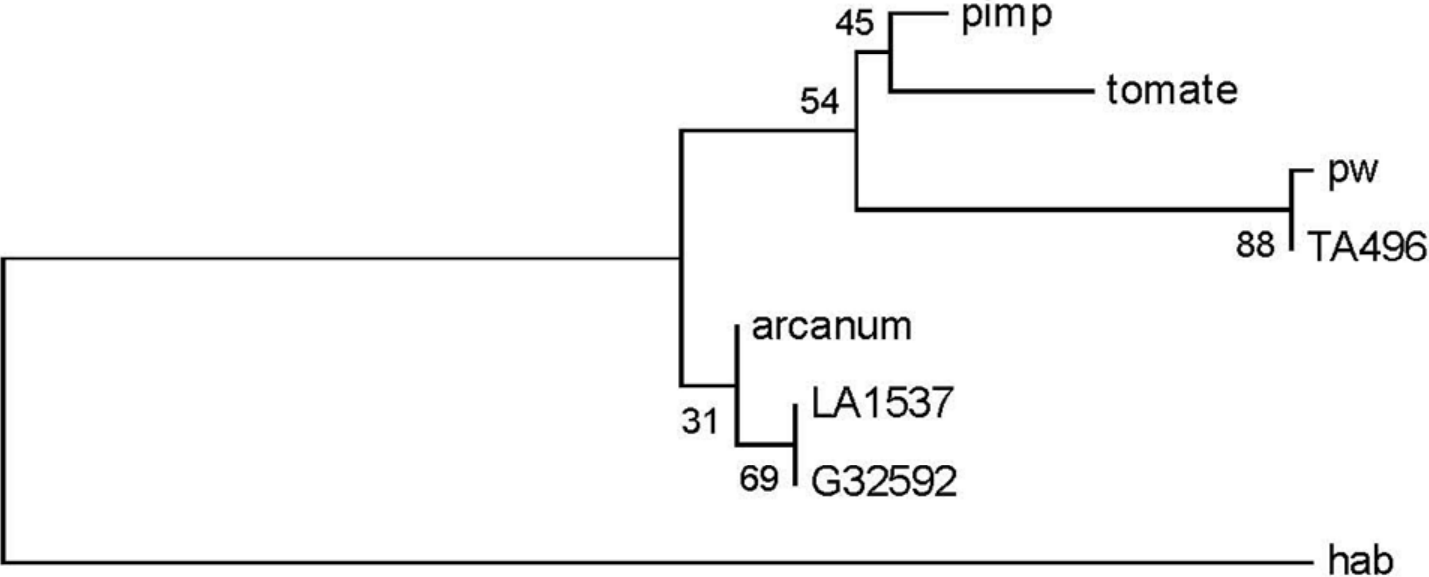

0.005

LeSNP25  
220\_1

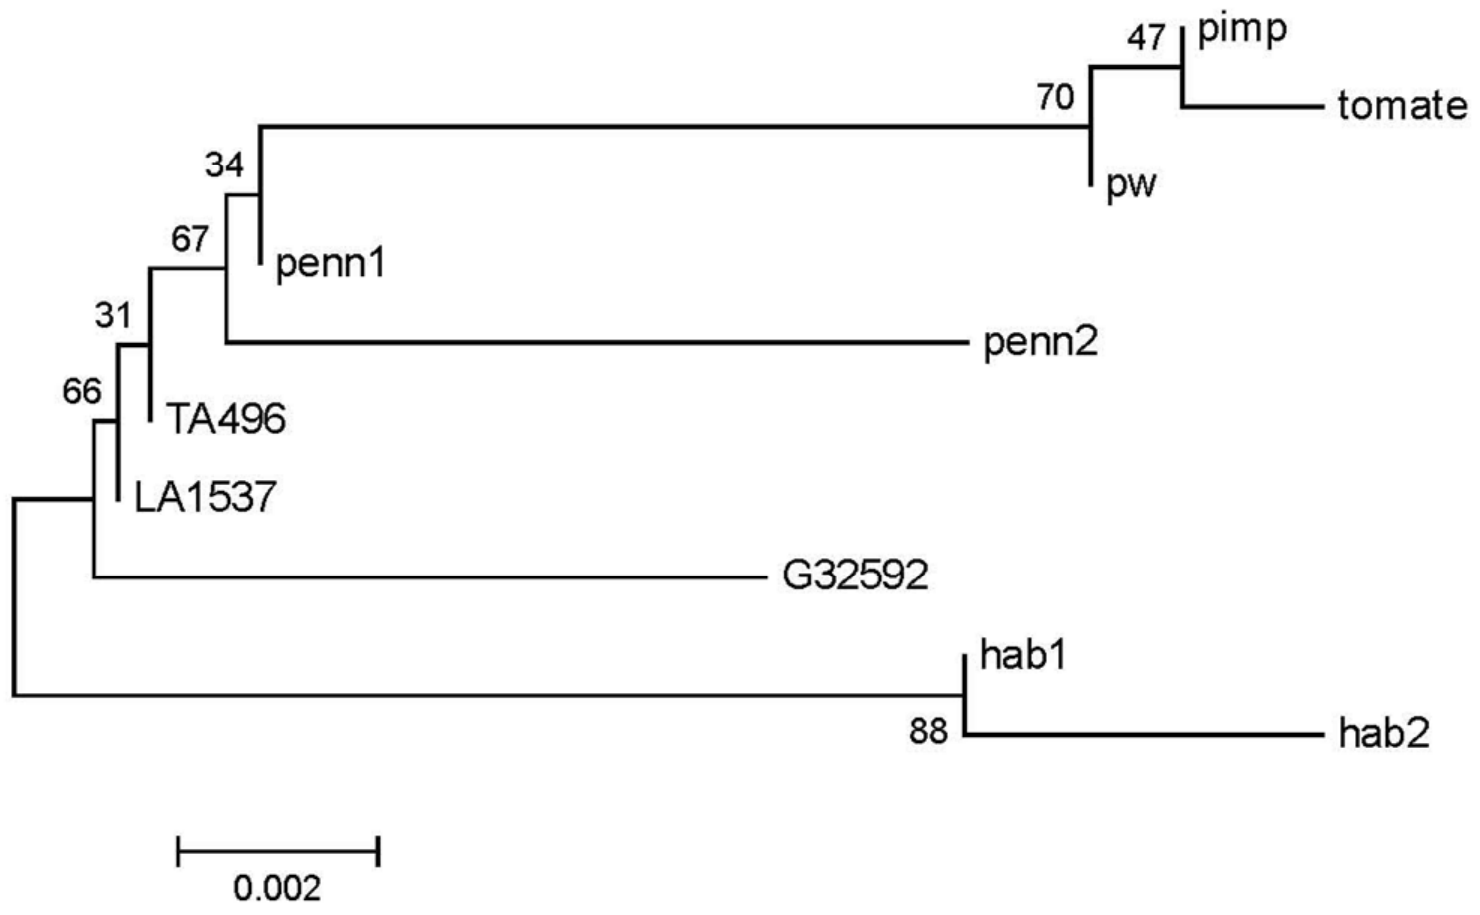

LeSNP27  
2280\_1

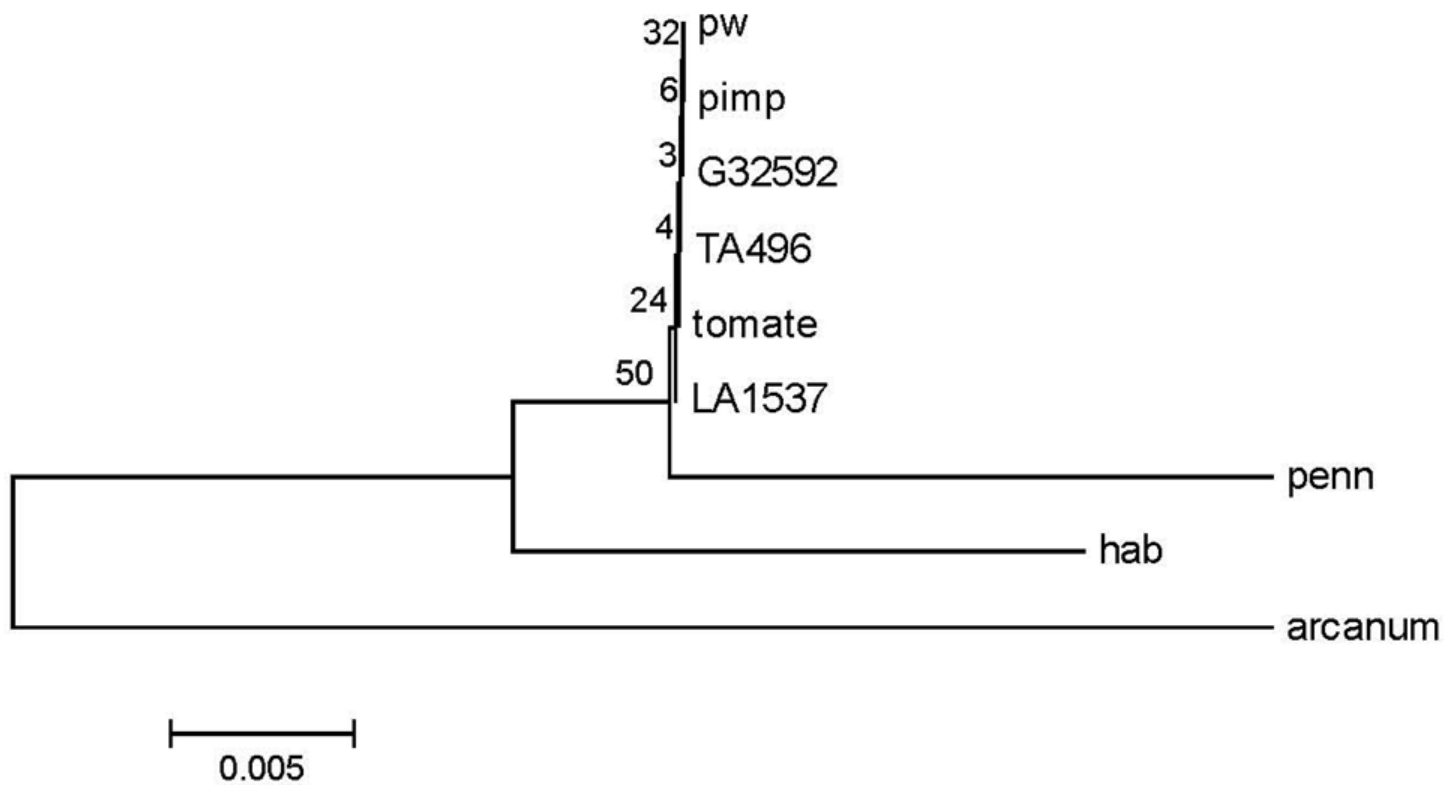



LeSNP28b  
241\_2b

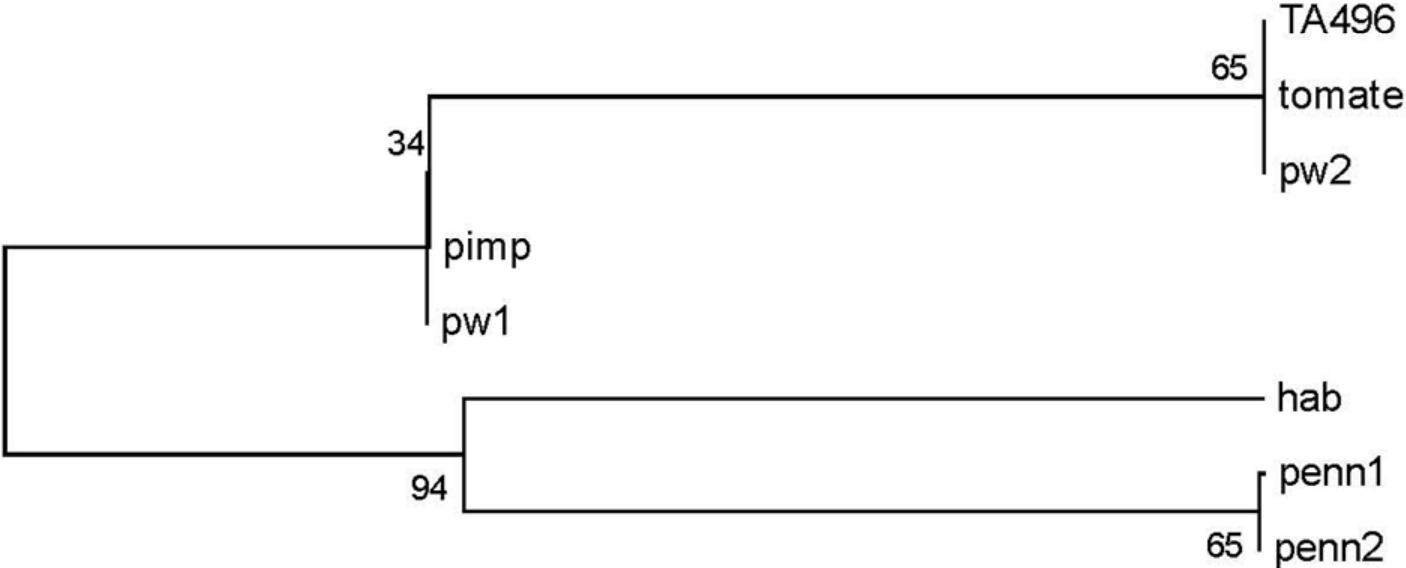

0.001

LeSNP30  
2486\_1

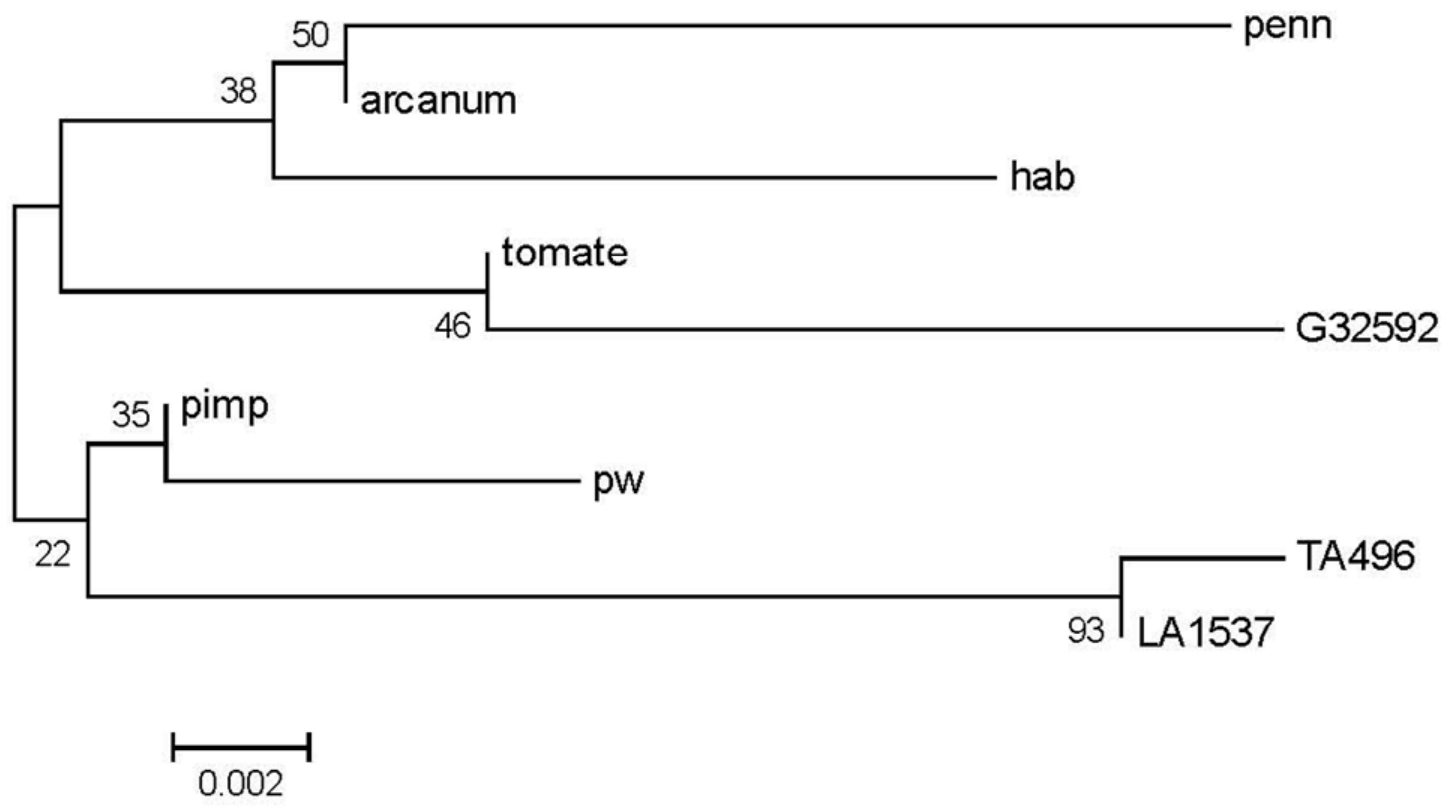

LeSNP32  
2582\_1

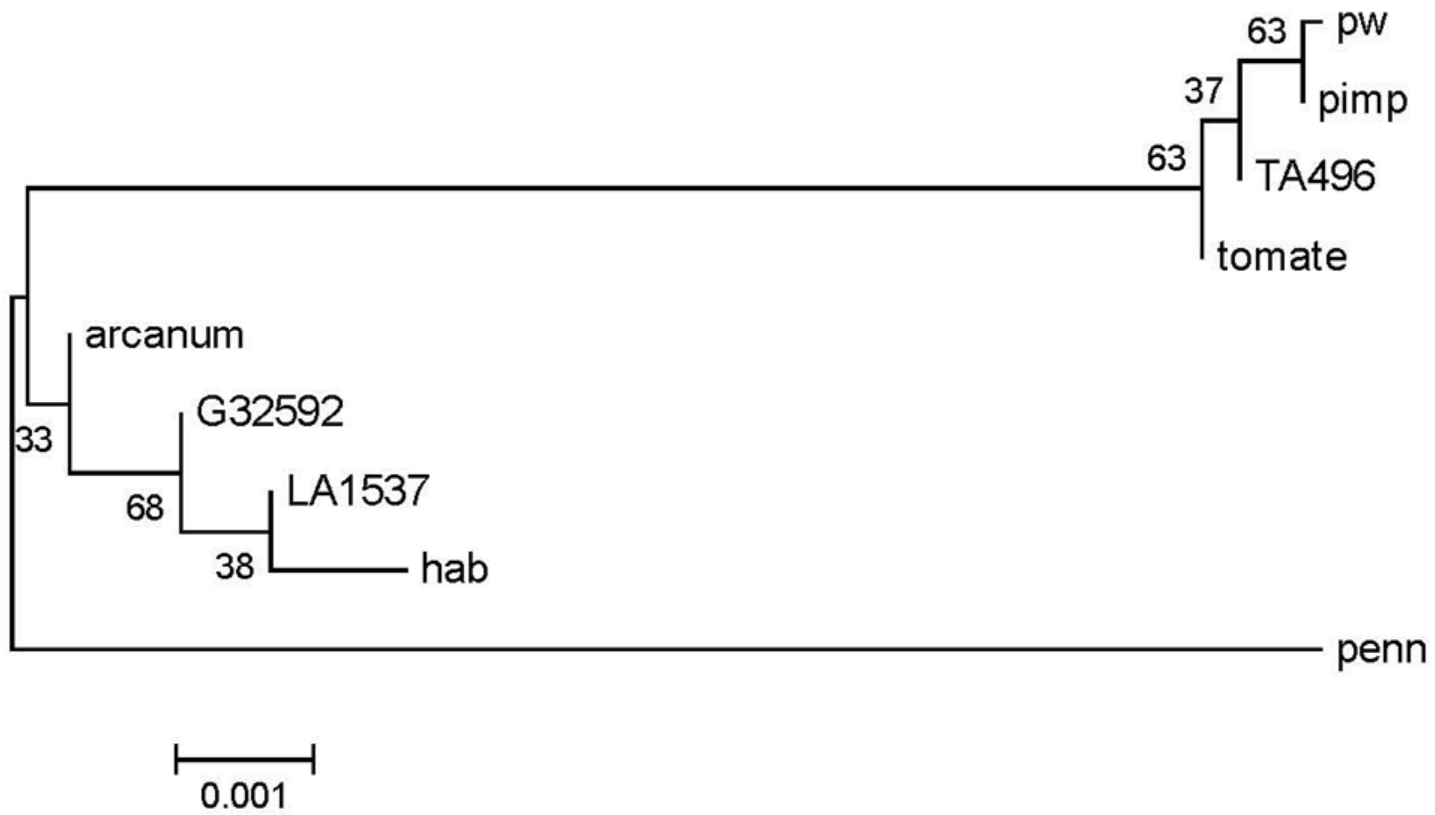

LeSNP33  
2719\_1

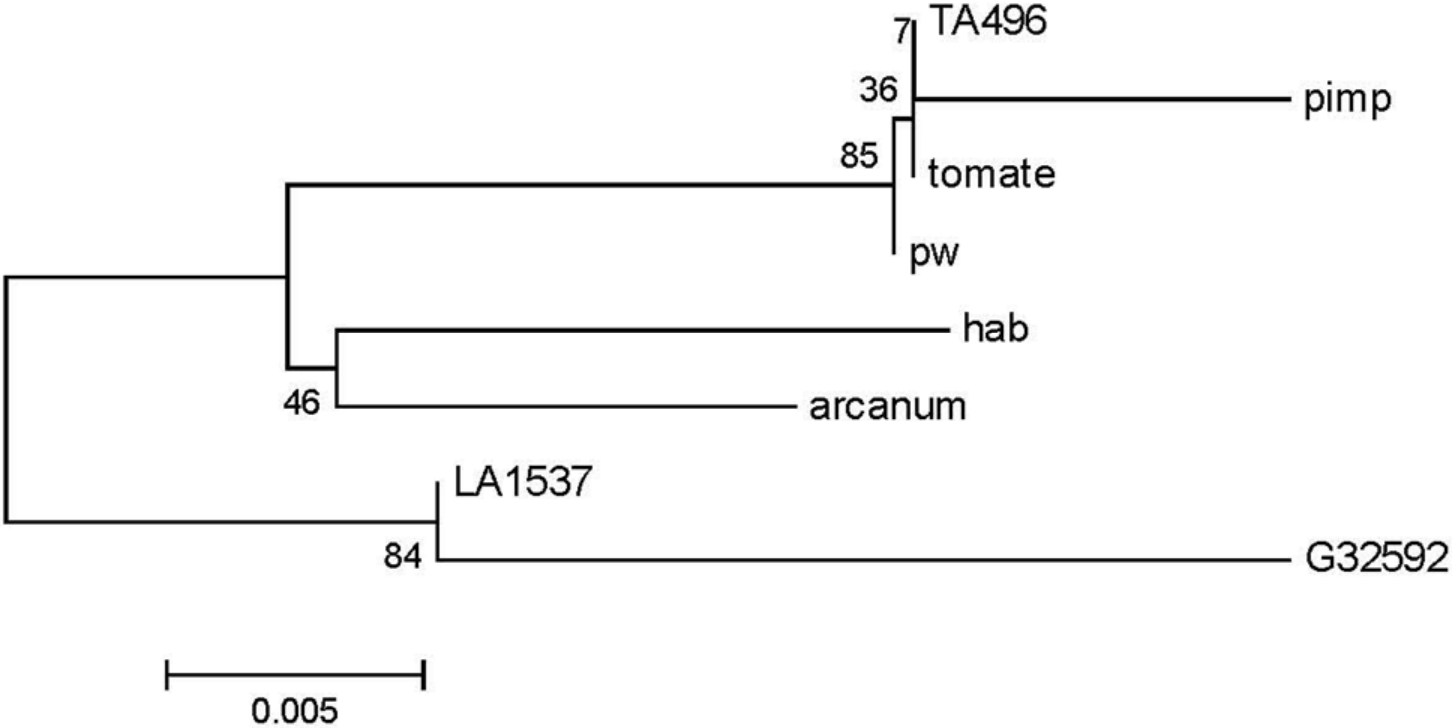

LeSNP34  
2819\_5

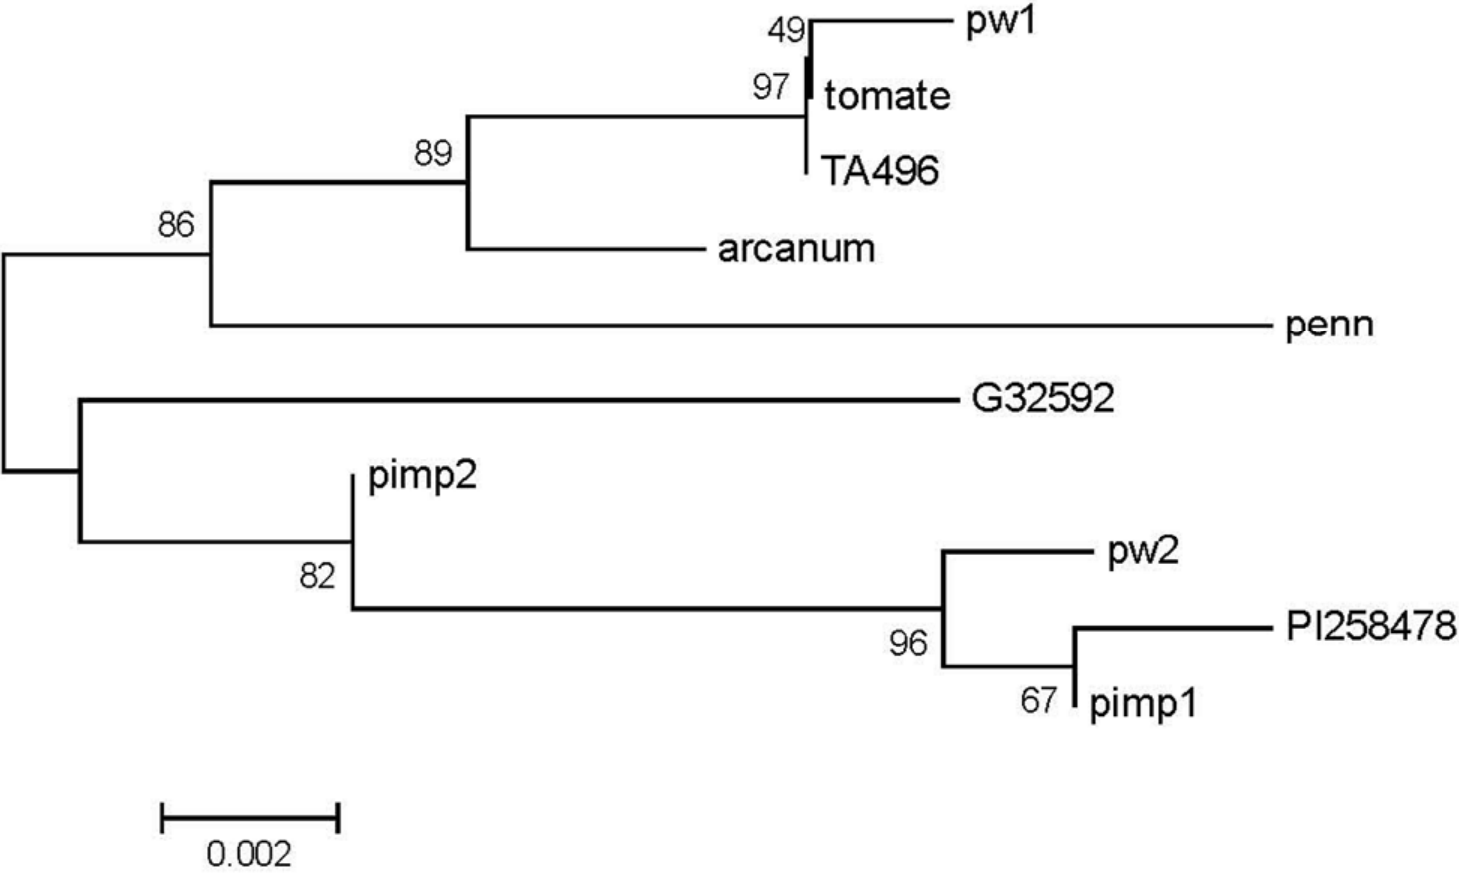

LeSNP35b  
2875\_4b

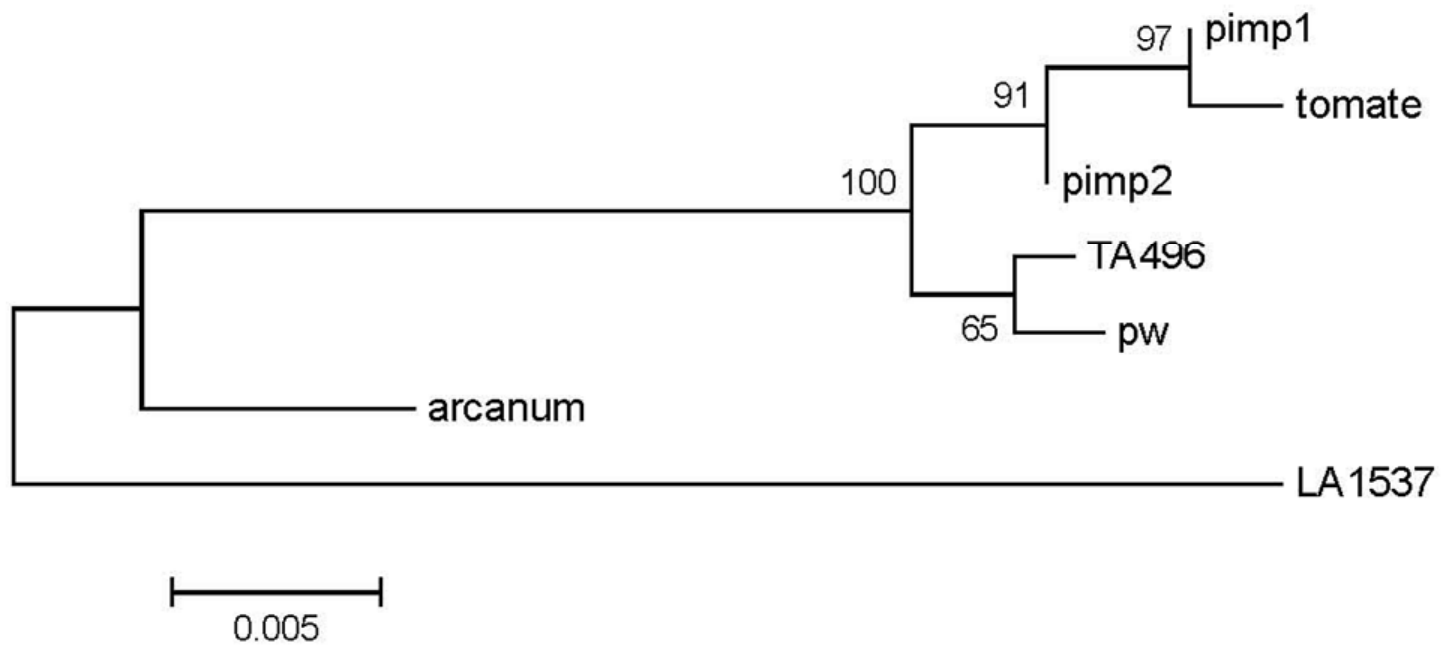

LeSNP40b  
296\_1b

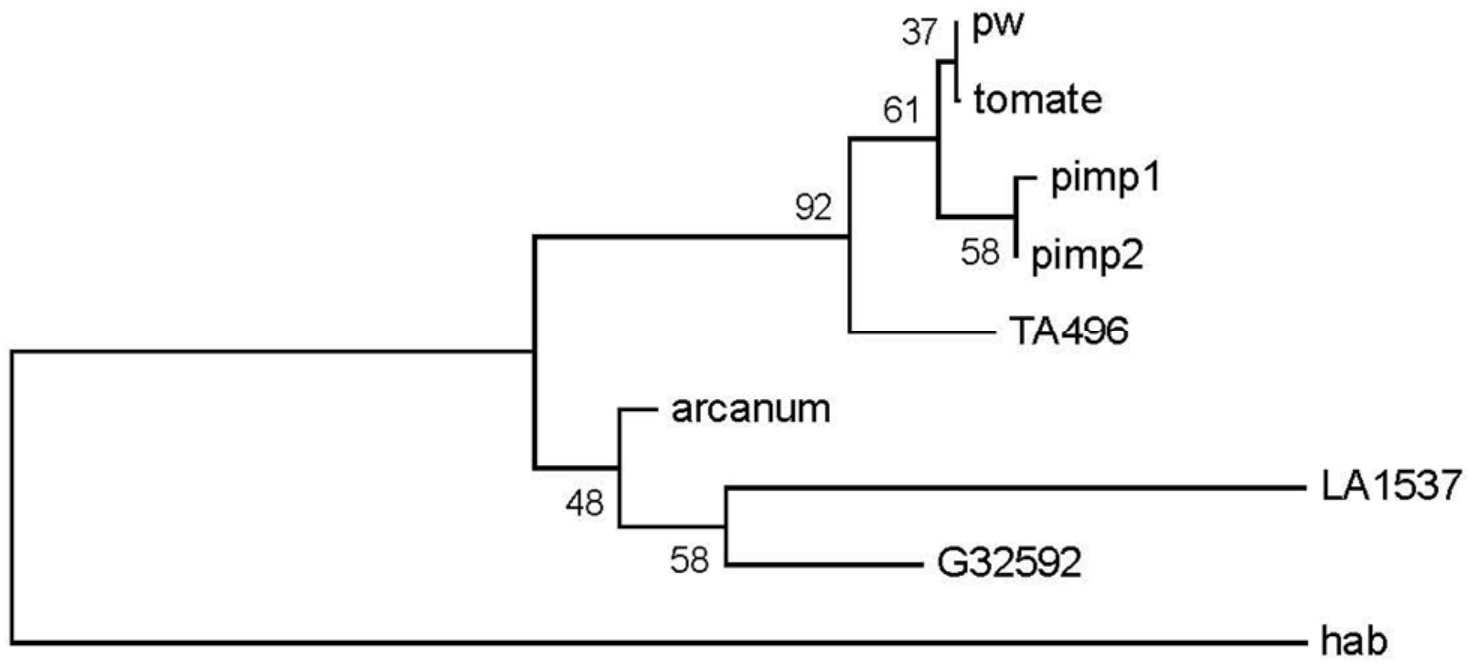

0.005

COS1  
U146140

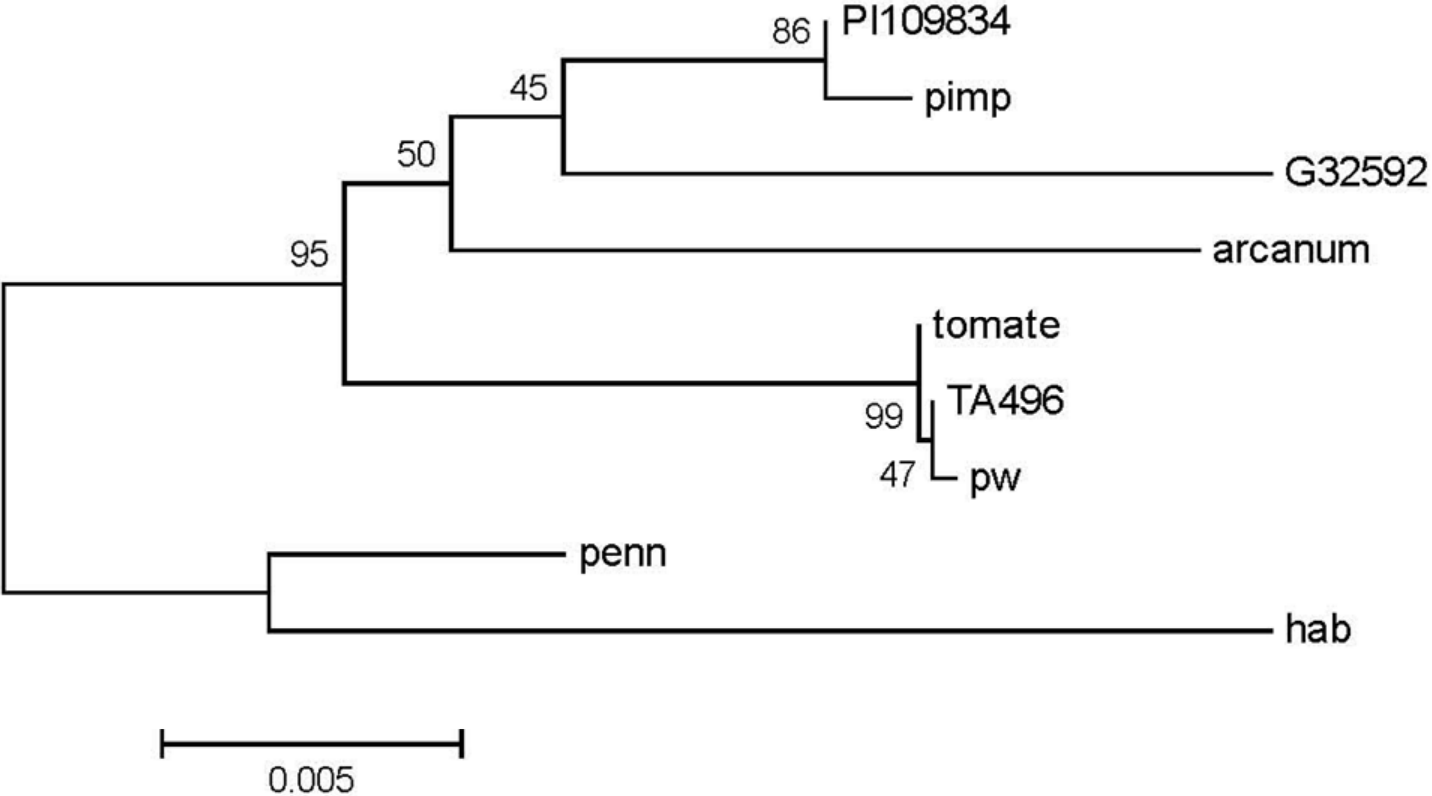



COS2  
C2\_At1g13380

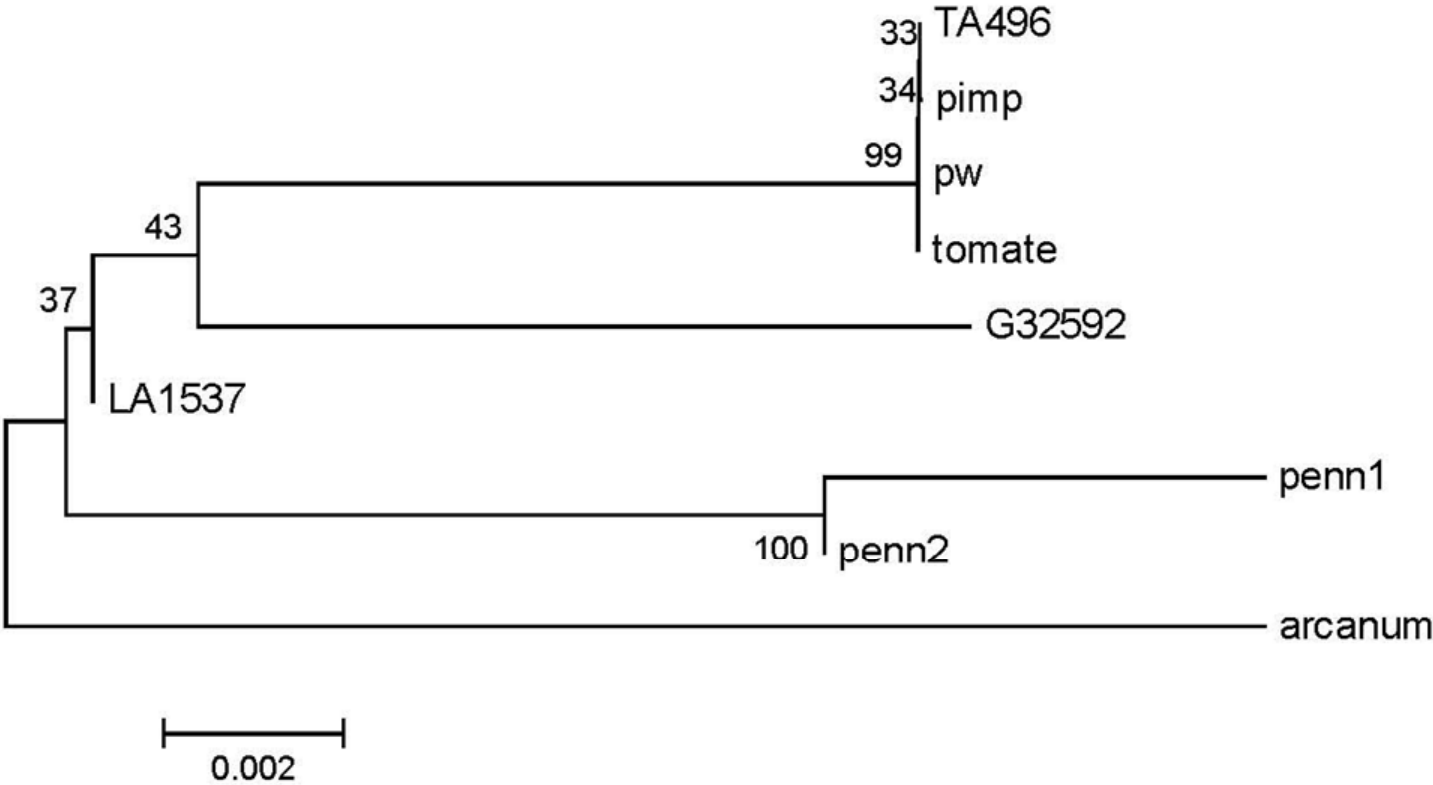

COS3  
C2\_At1g14000

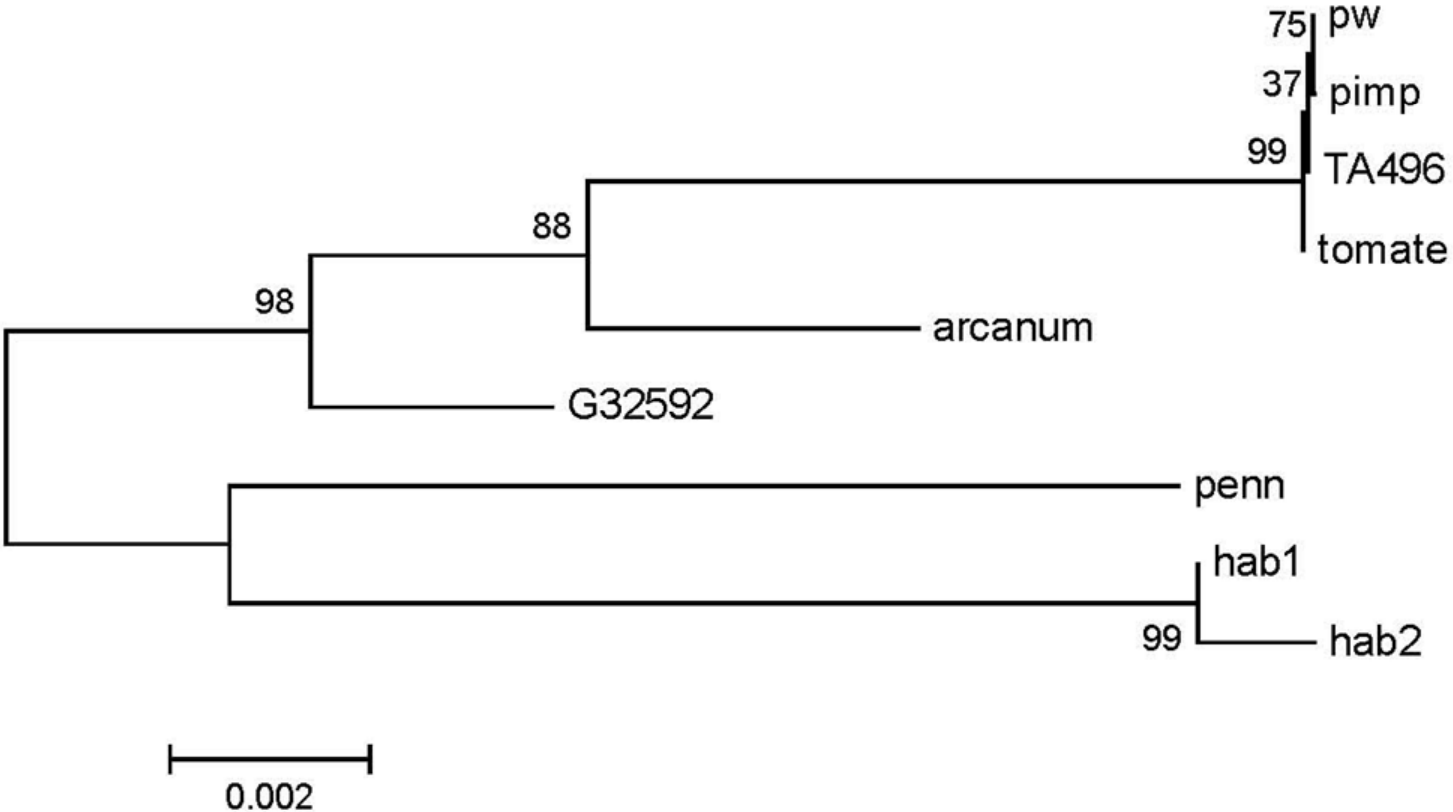

COS4  
C2\_At1g20050

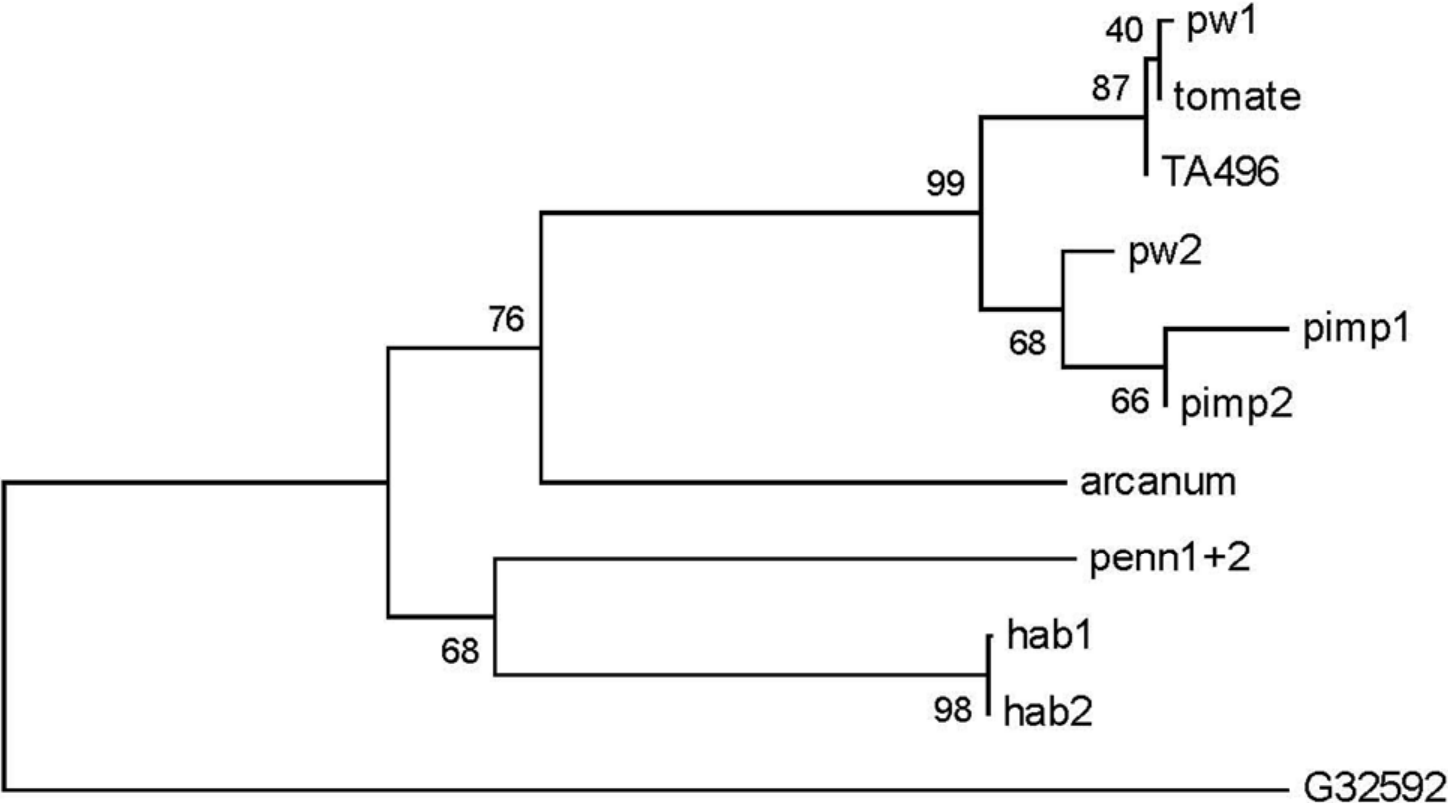

0.002

COS5  
C2\_At1g32130

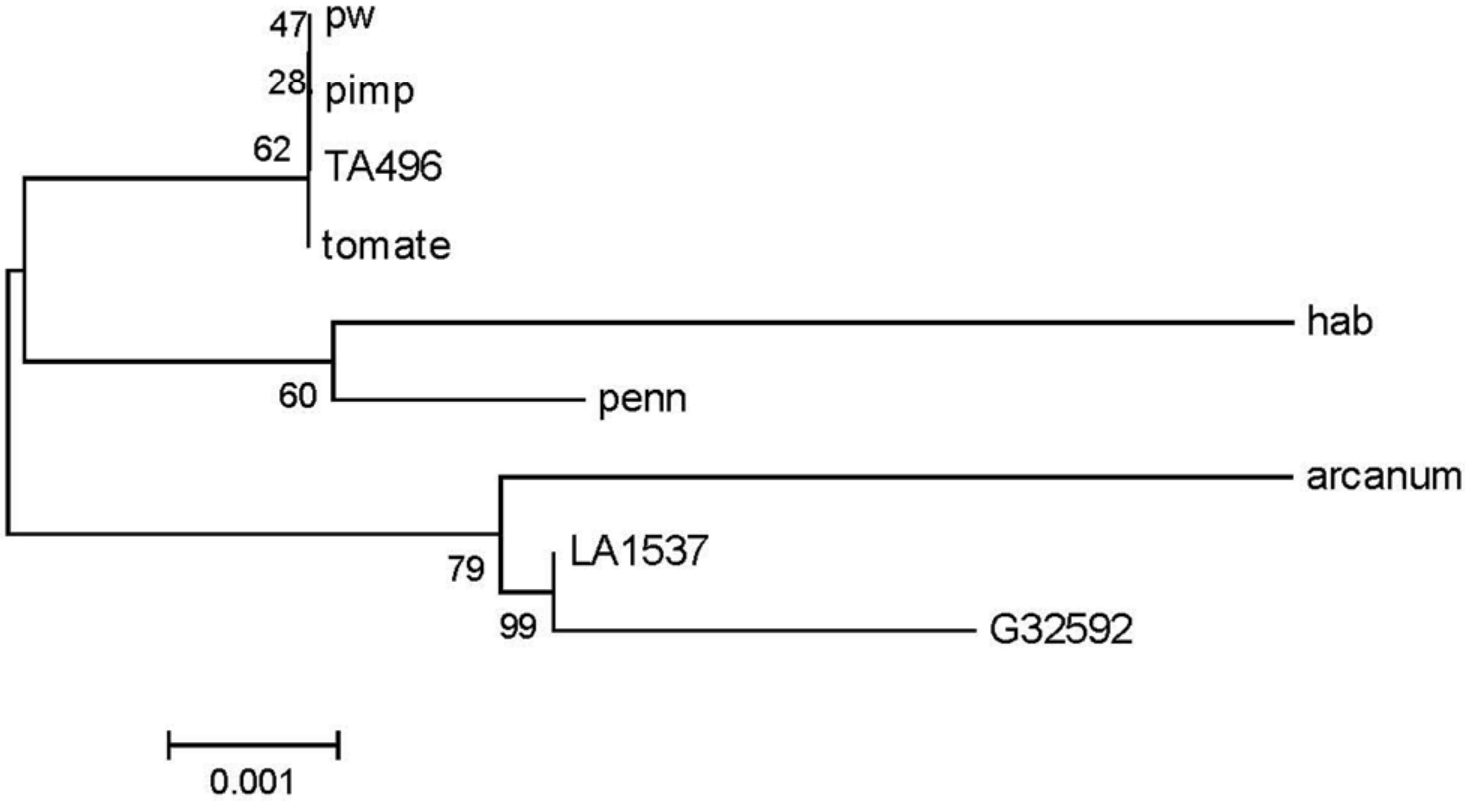

COS7  
C2\_At1g44575

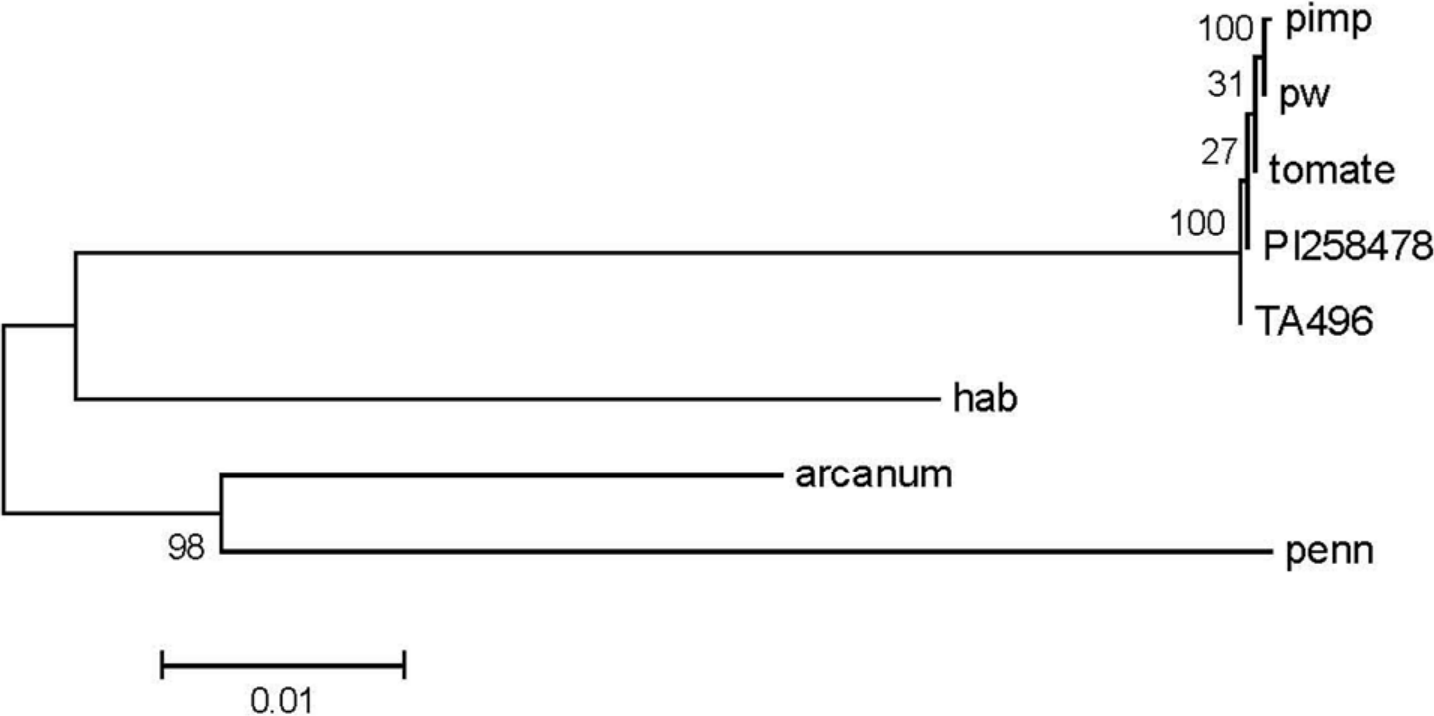

COS9  
C2\_At1g50020

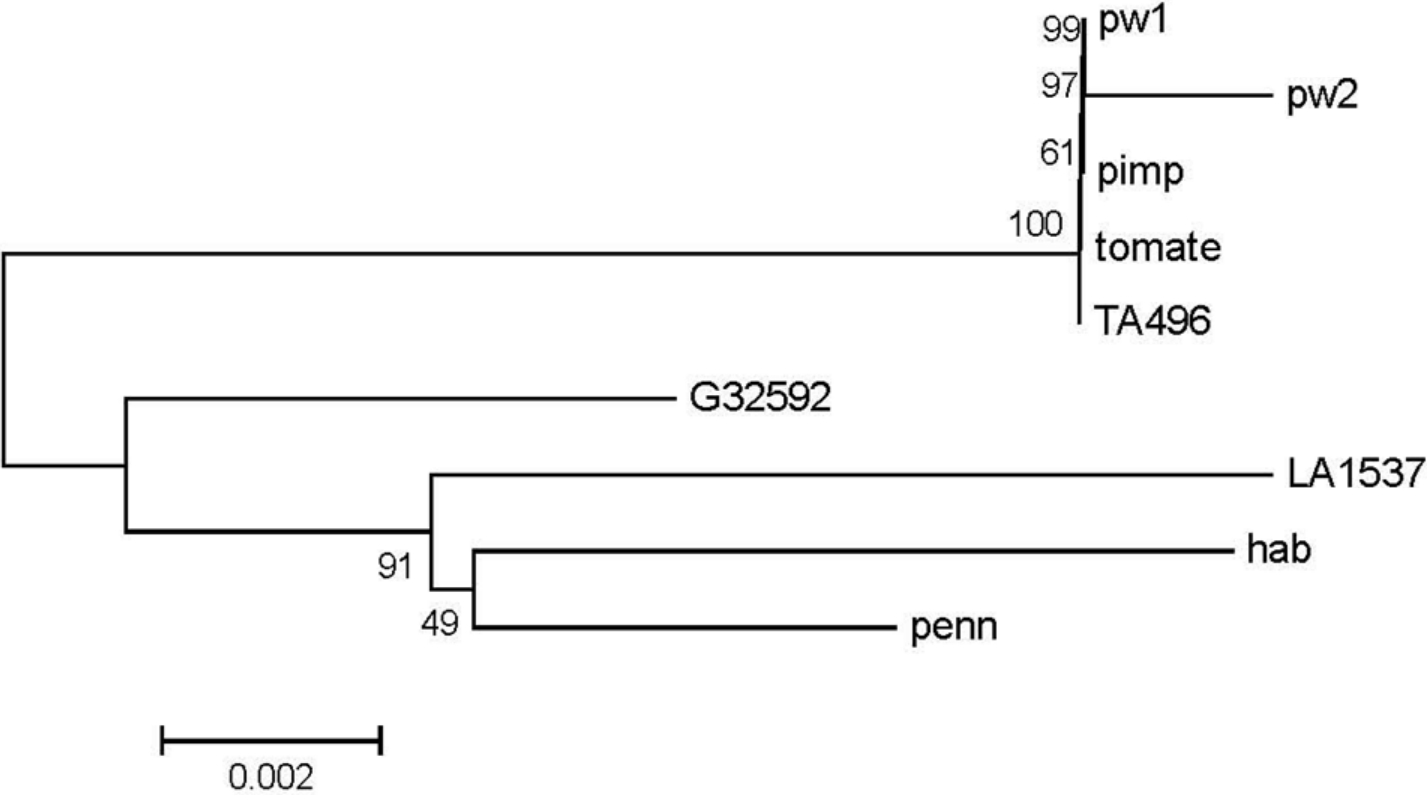

COS10  
C2\_At1g73180

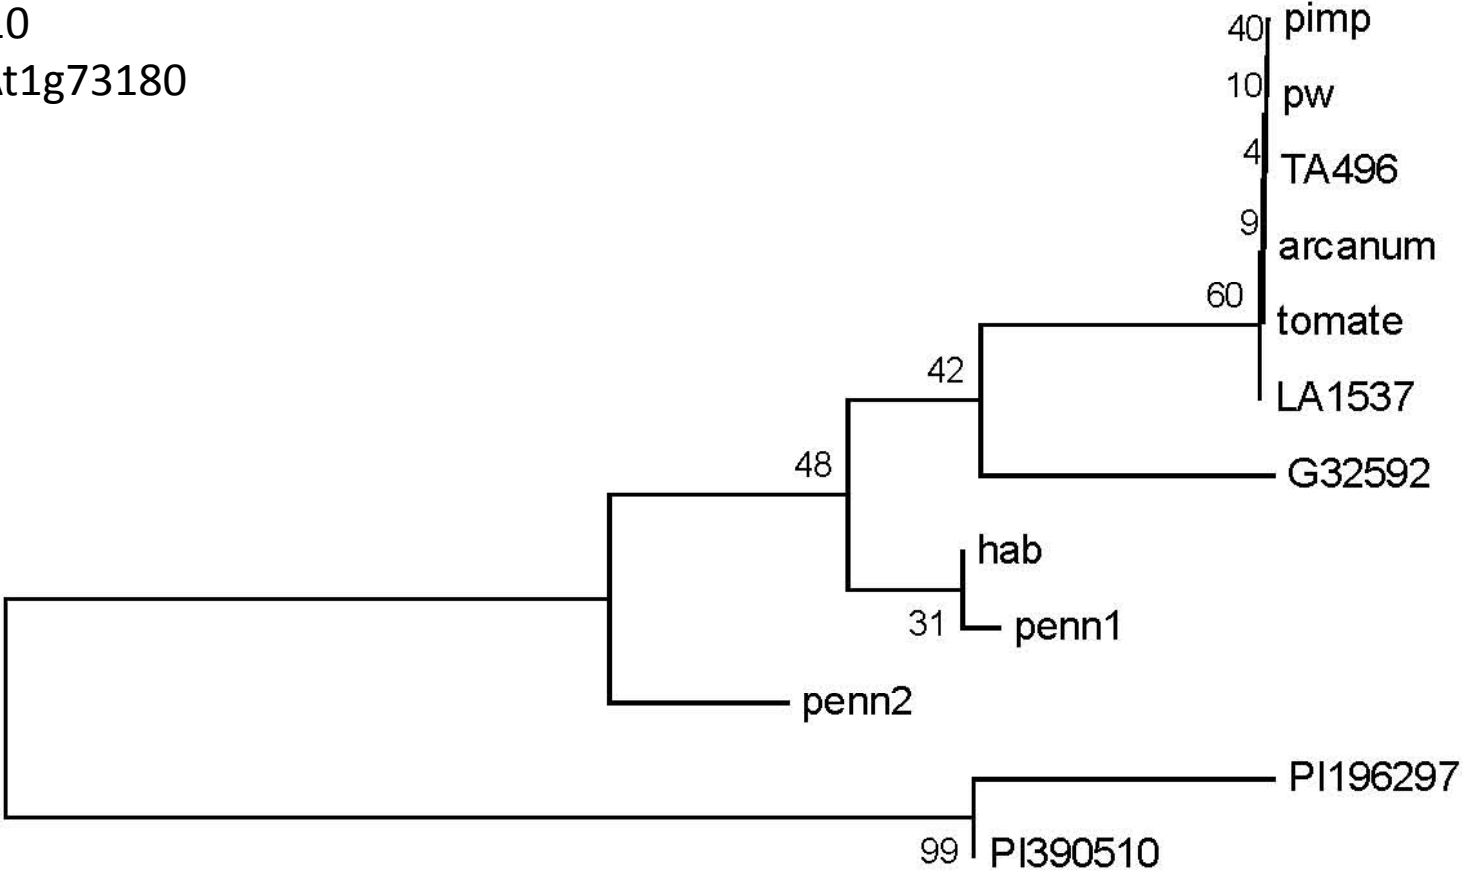

0.005

COS11  
C2\_At2g15890

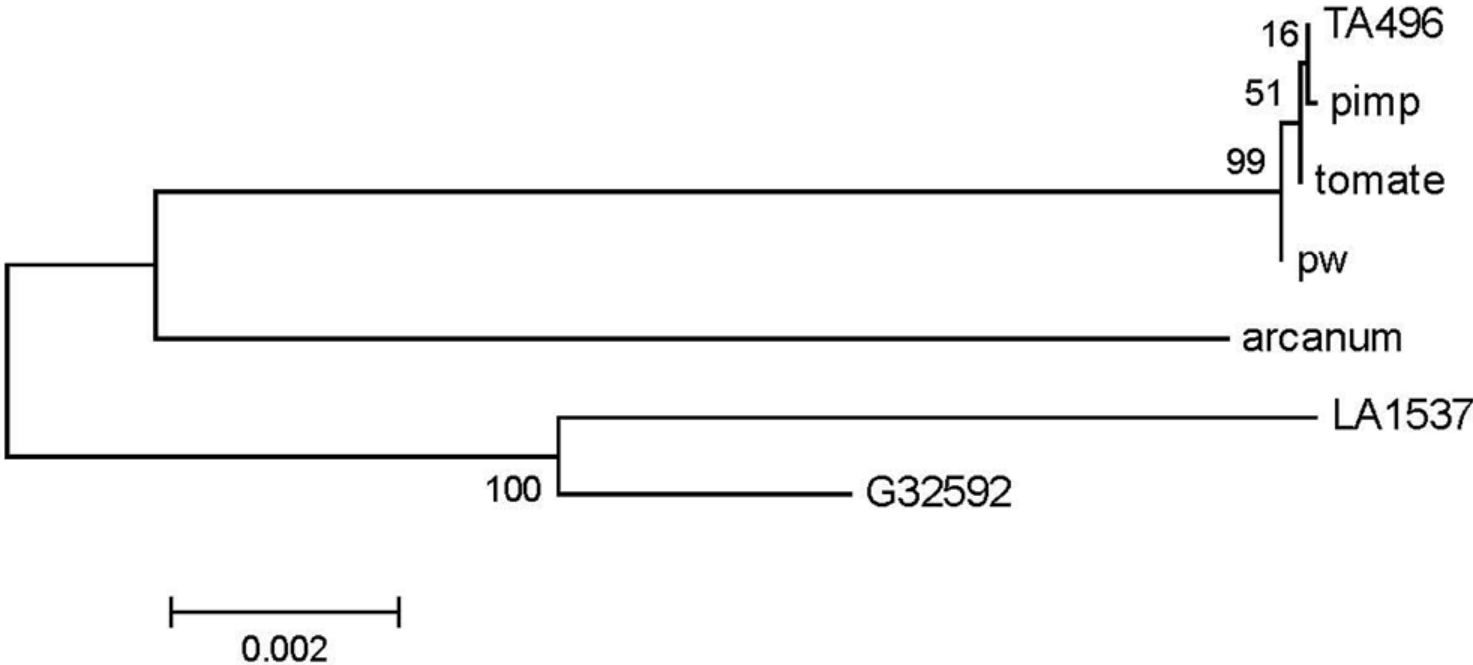



COS12  
C2\_At2g22570

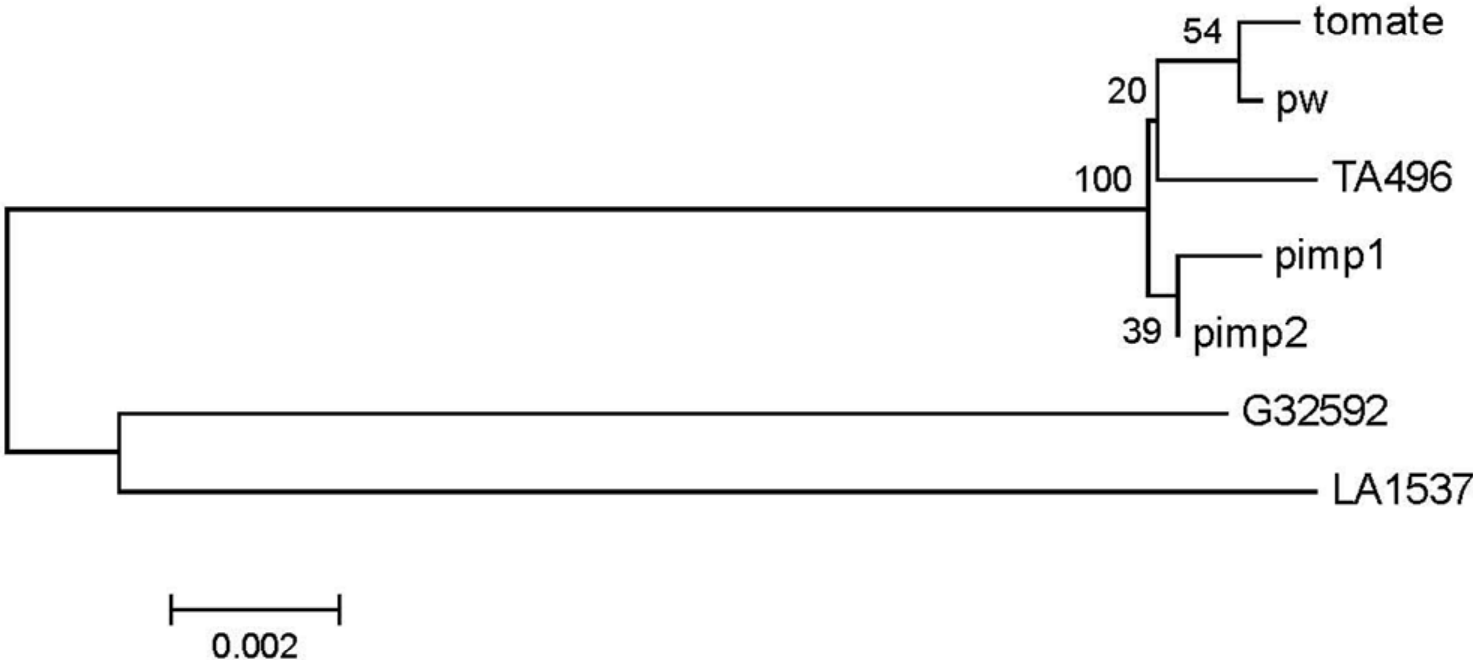

COS13  
C2\_At2g36930

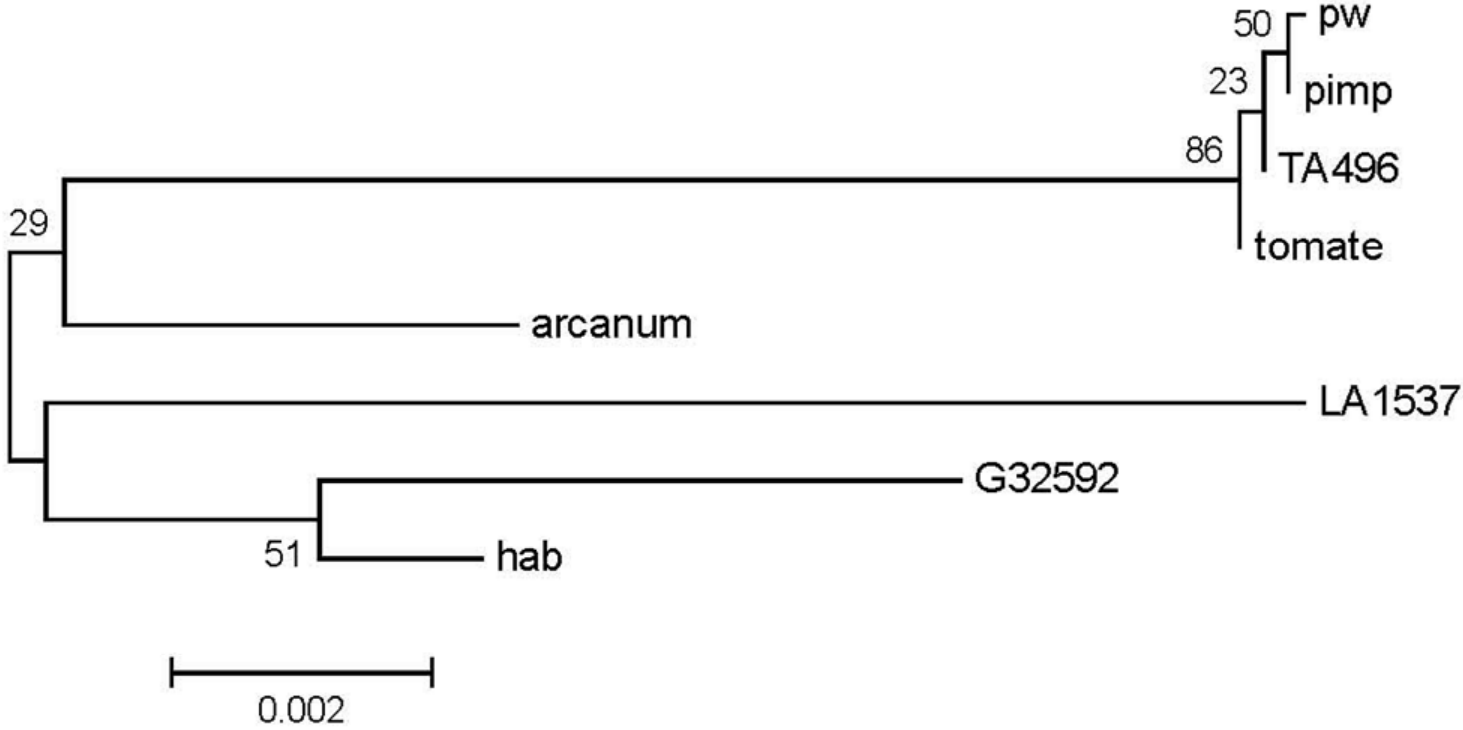

COS15  
U221402

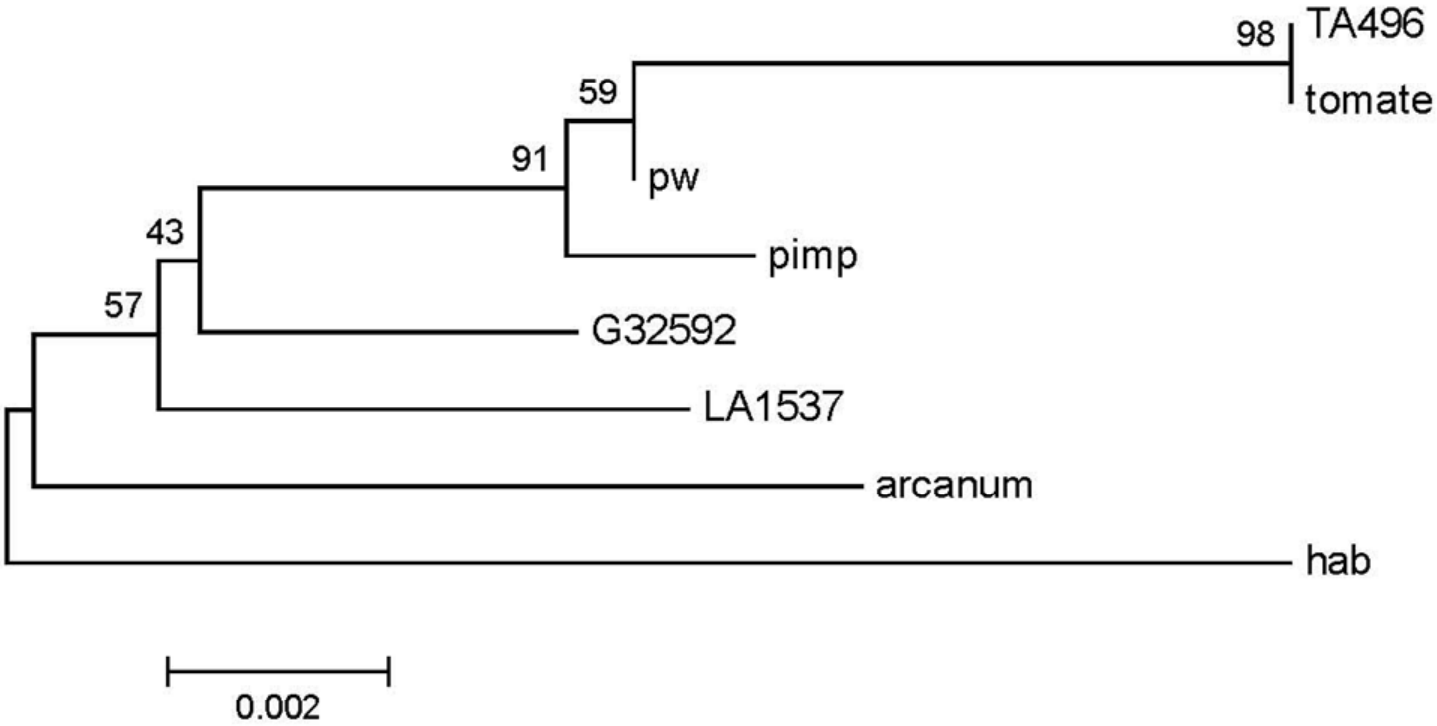

COS16  
U318882

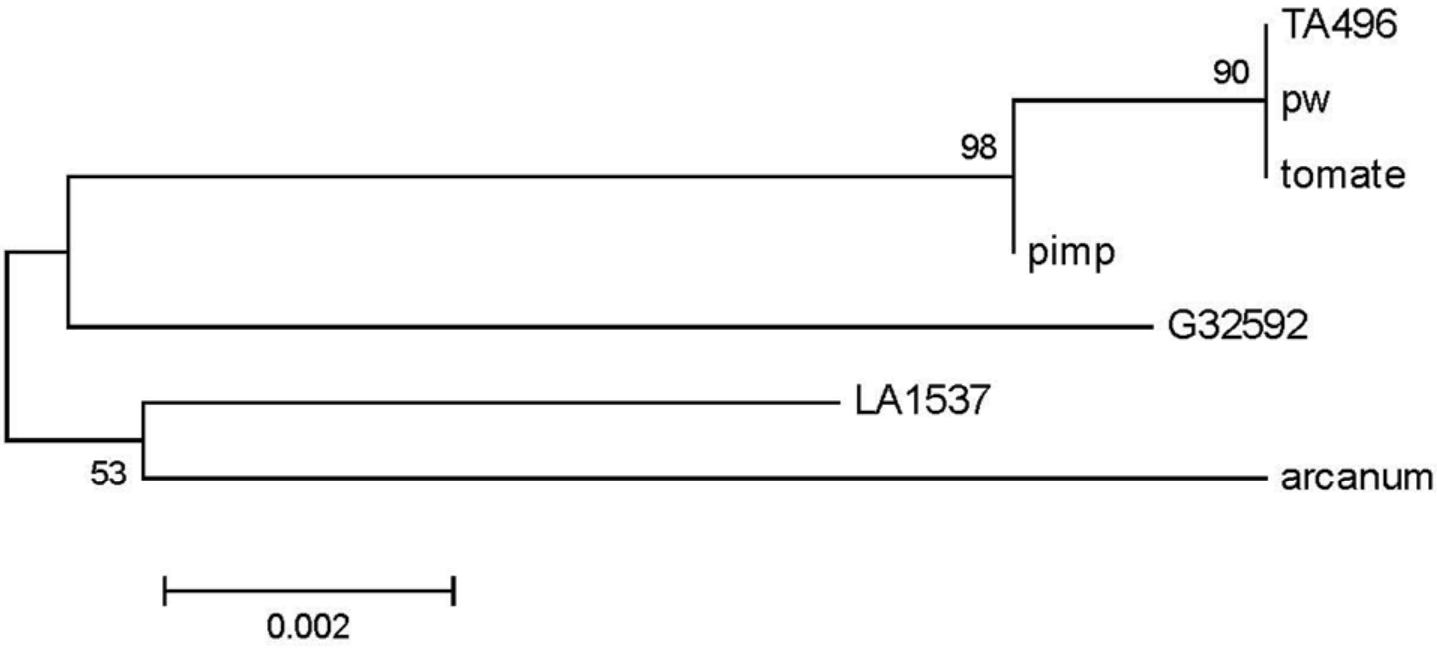

COS18  
U146437

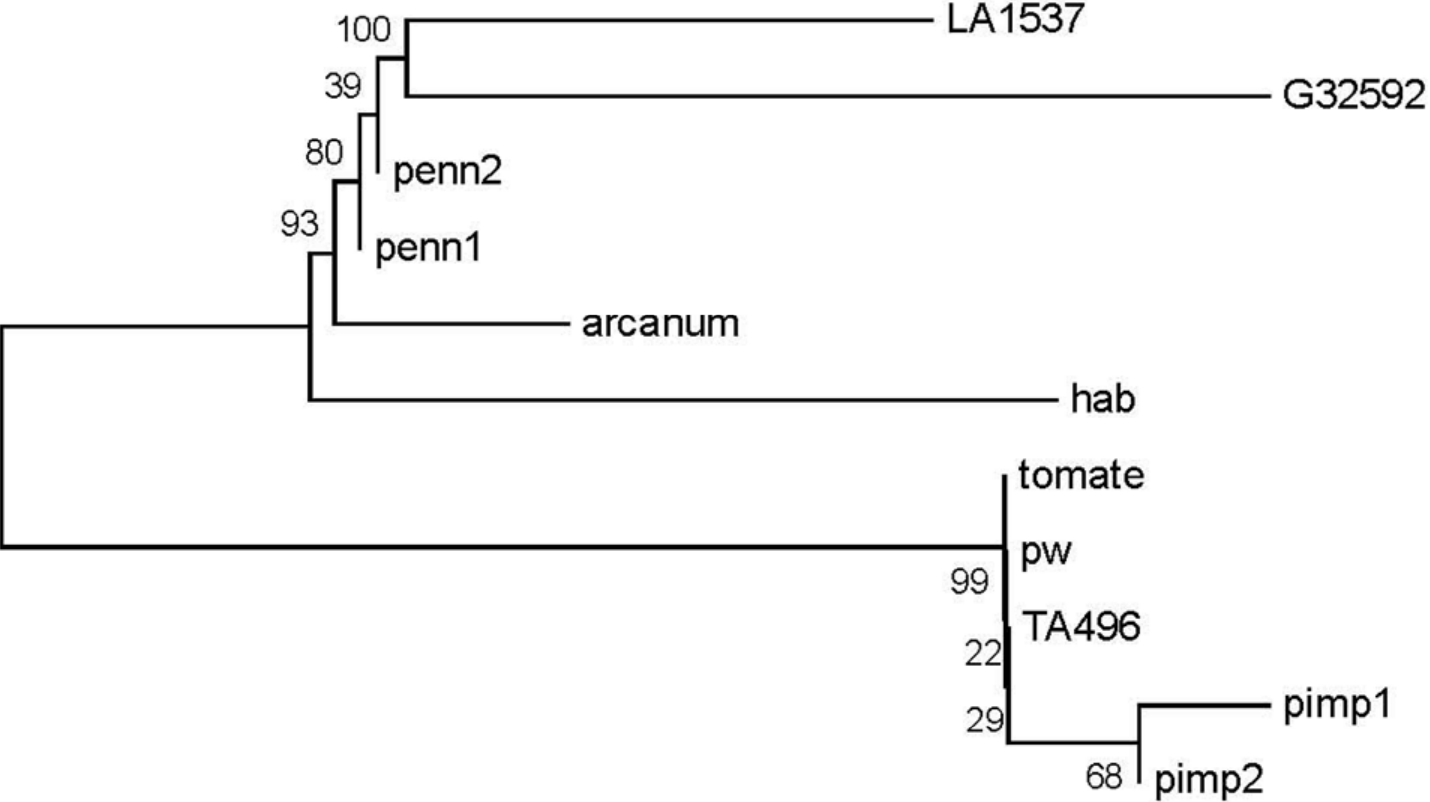

0.002

*hp2* exon 2

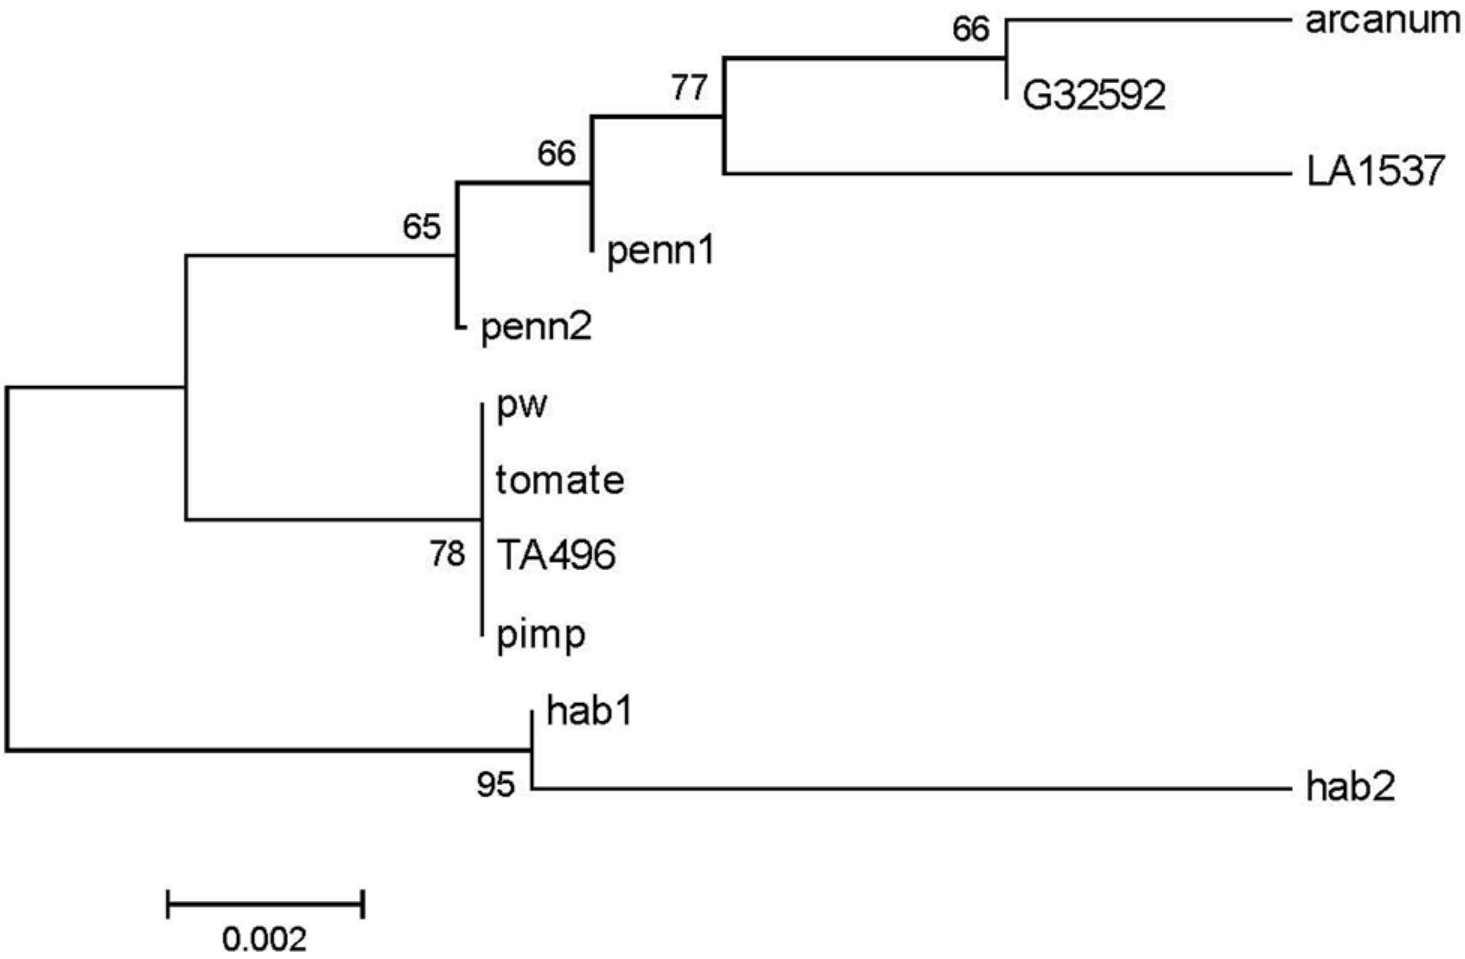

*Pds*

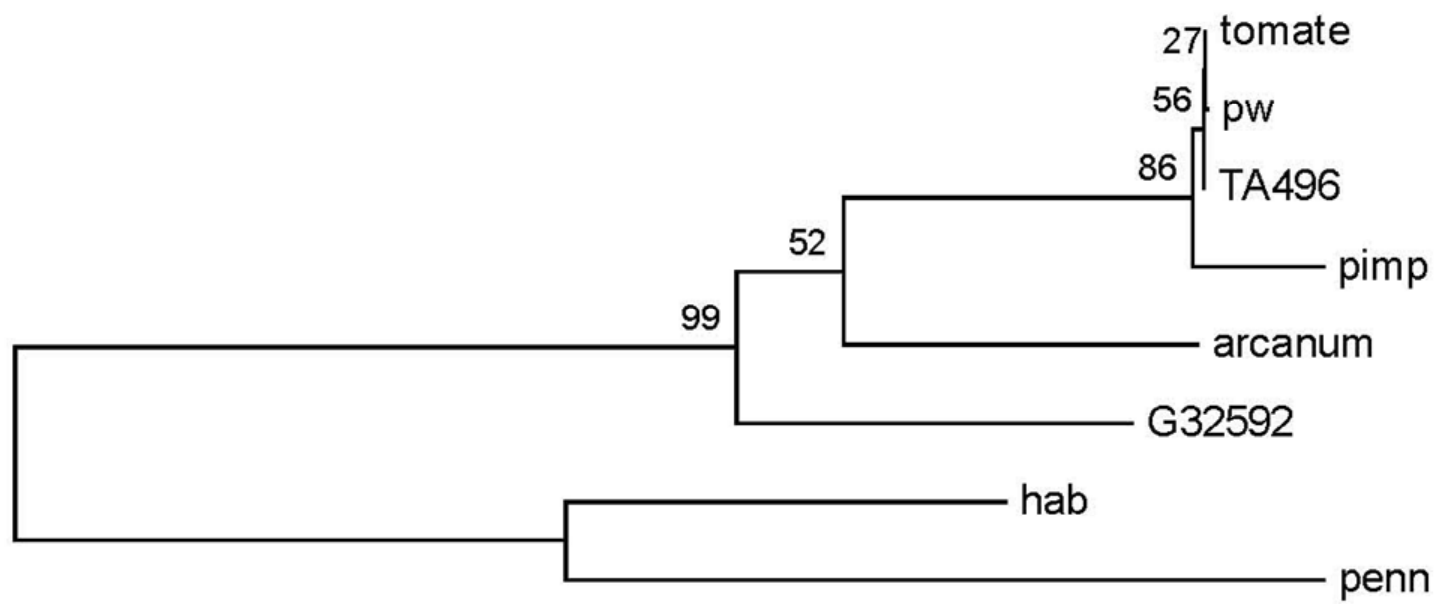

0.002

*Psy1*

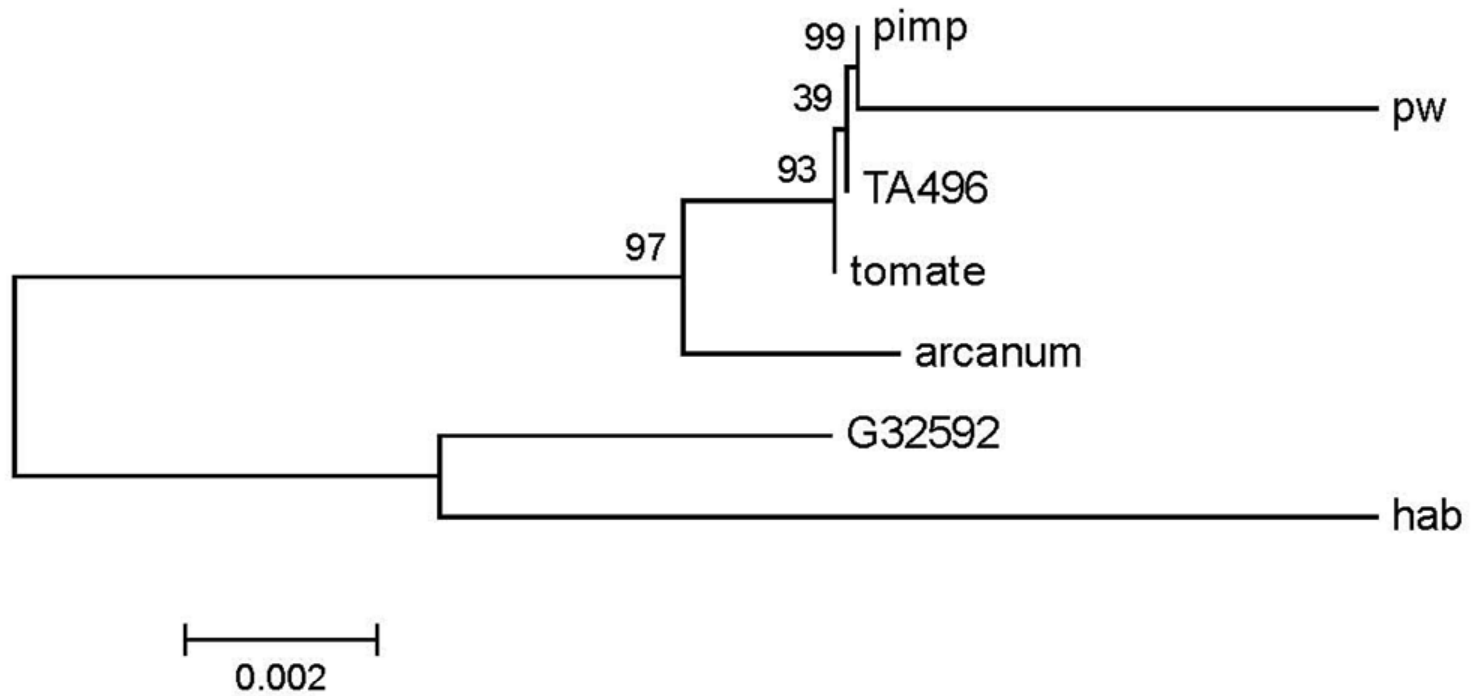



*Cyc-B* 5' region

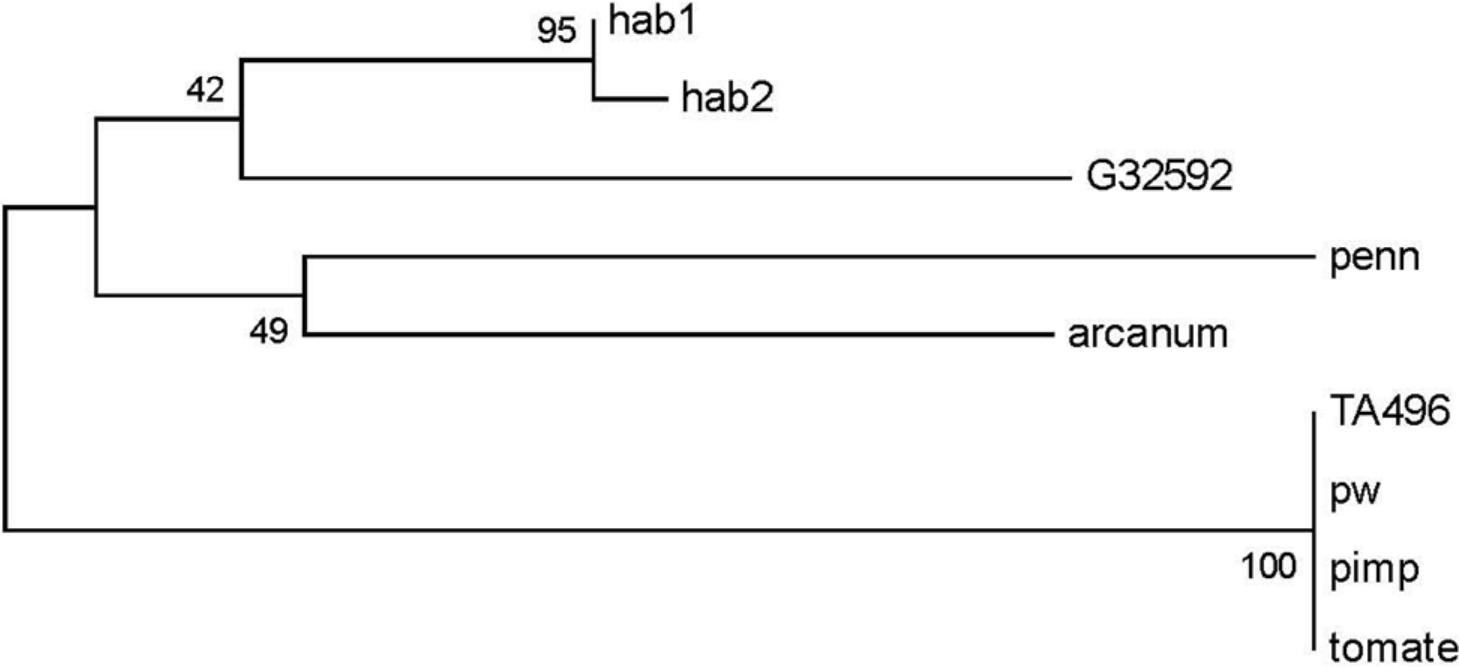

0.005

*hp2* 3' region

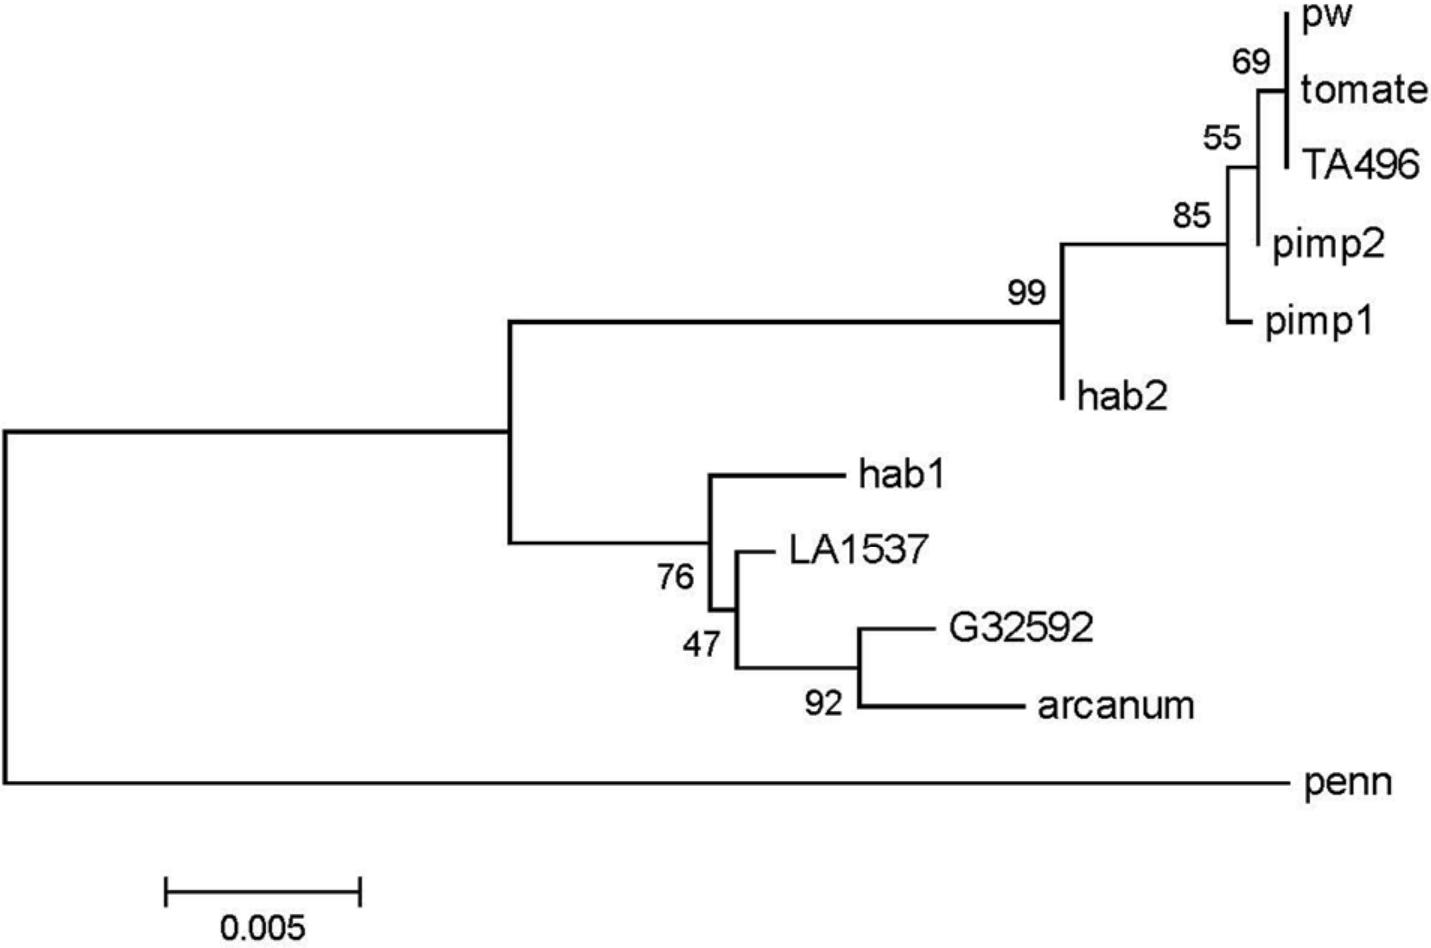

*fw 2.2*

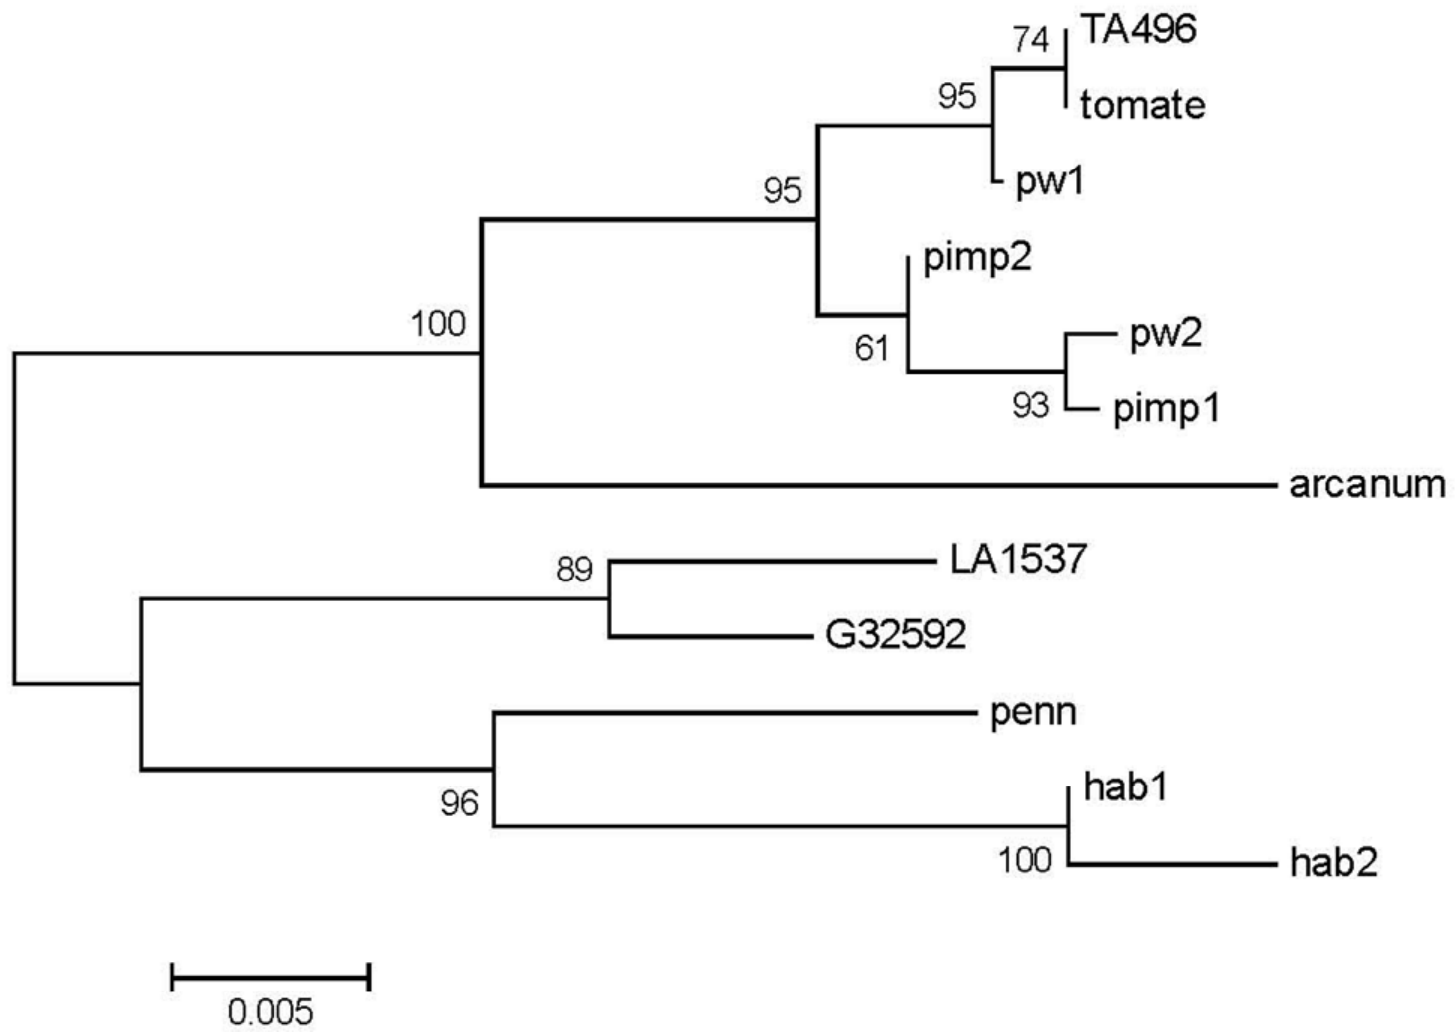

TG11

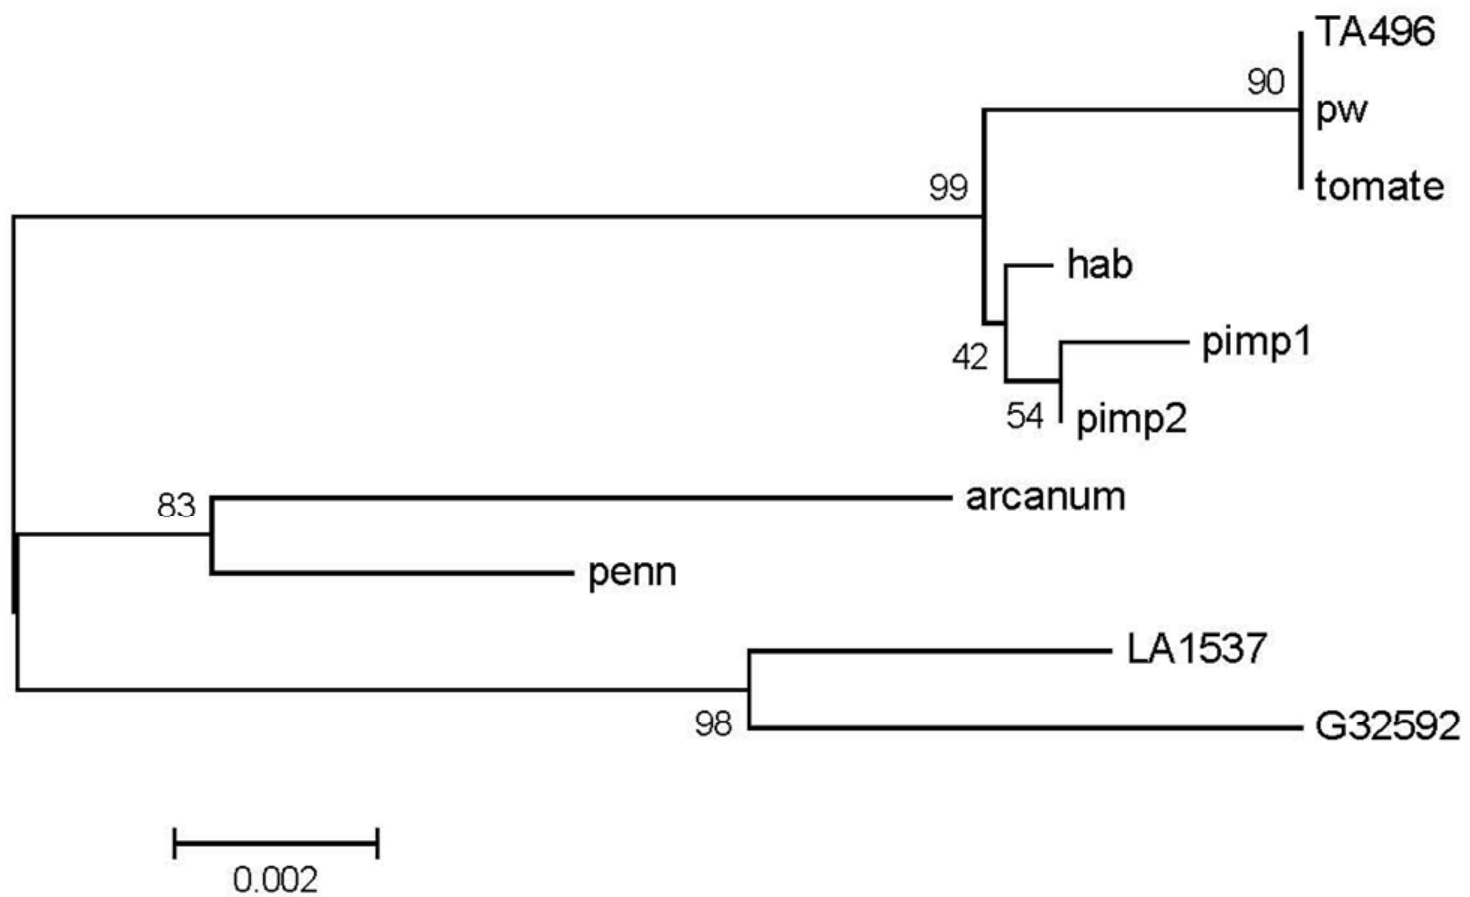

CRTISO

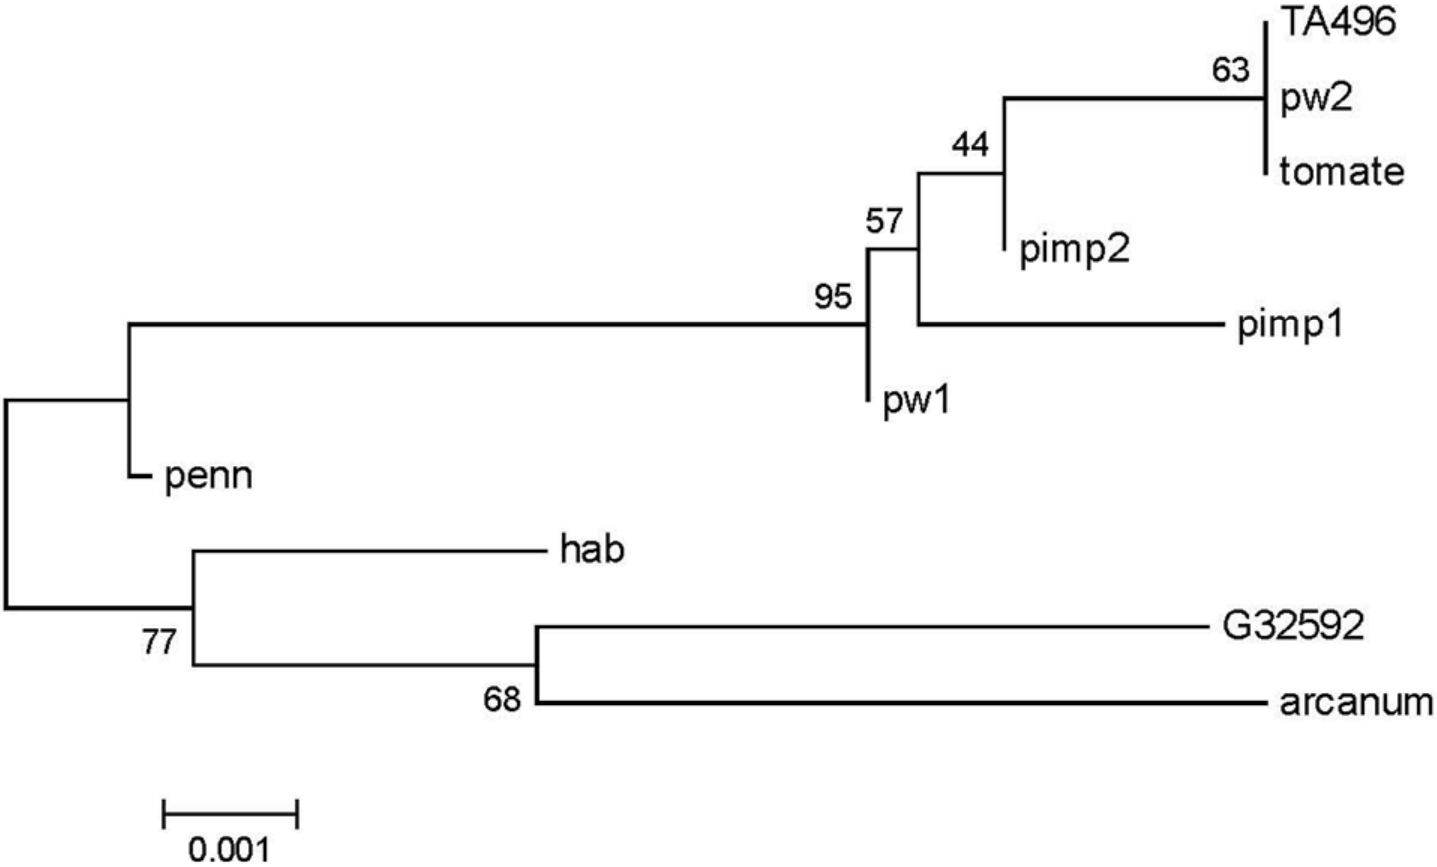

*rin*

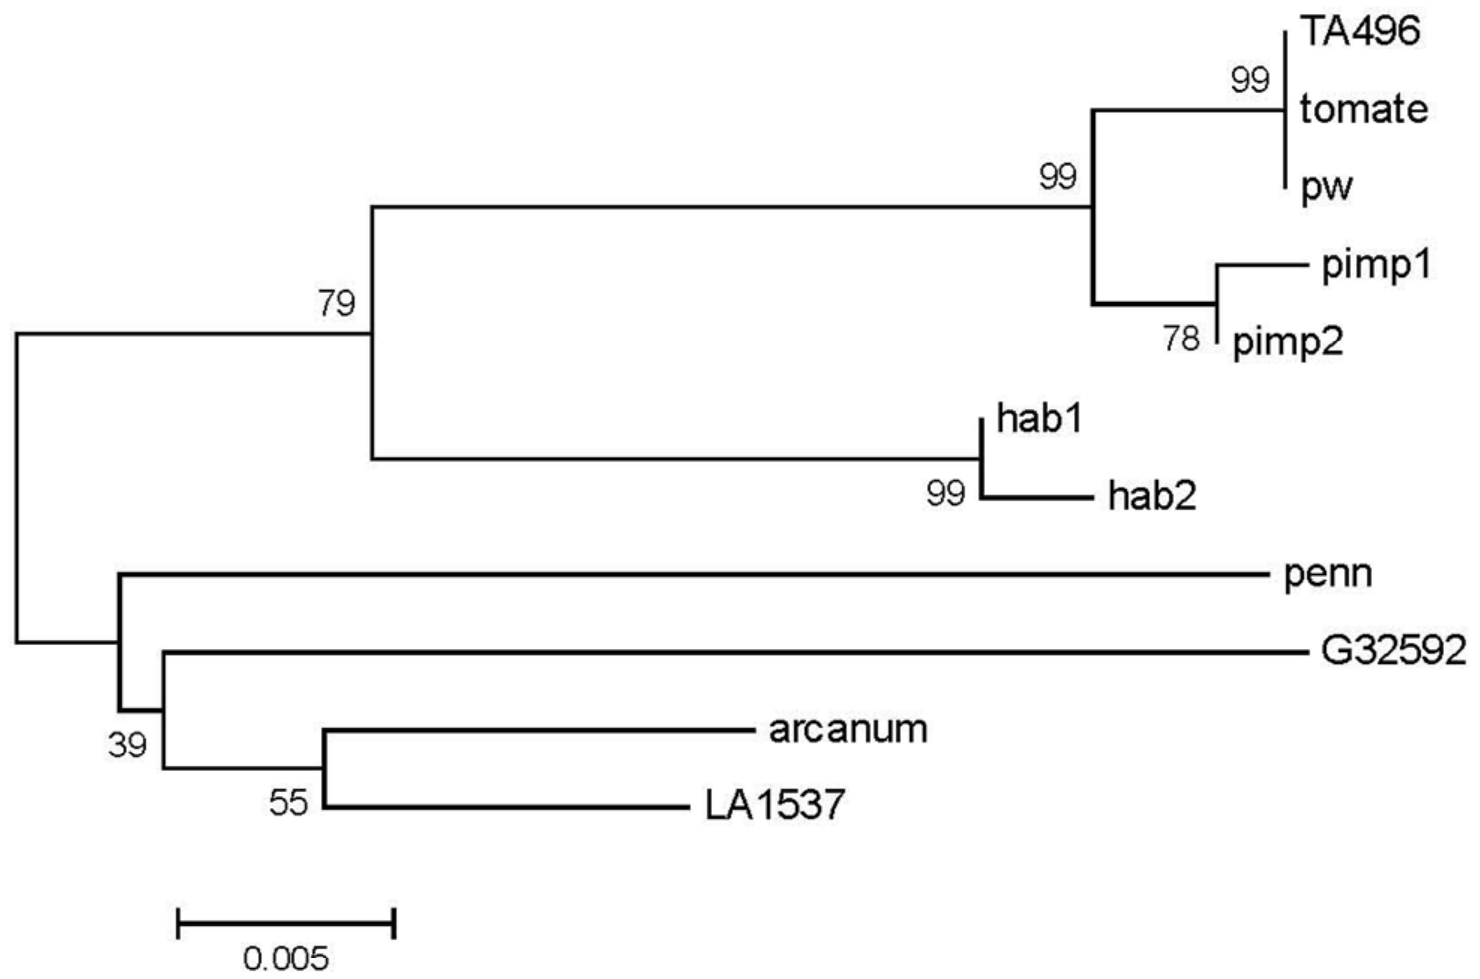

*PTOX*

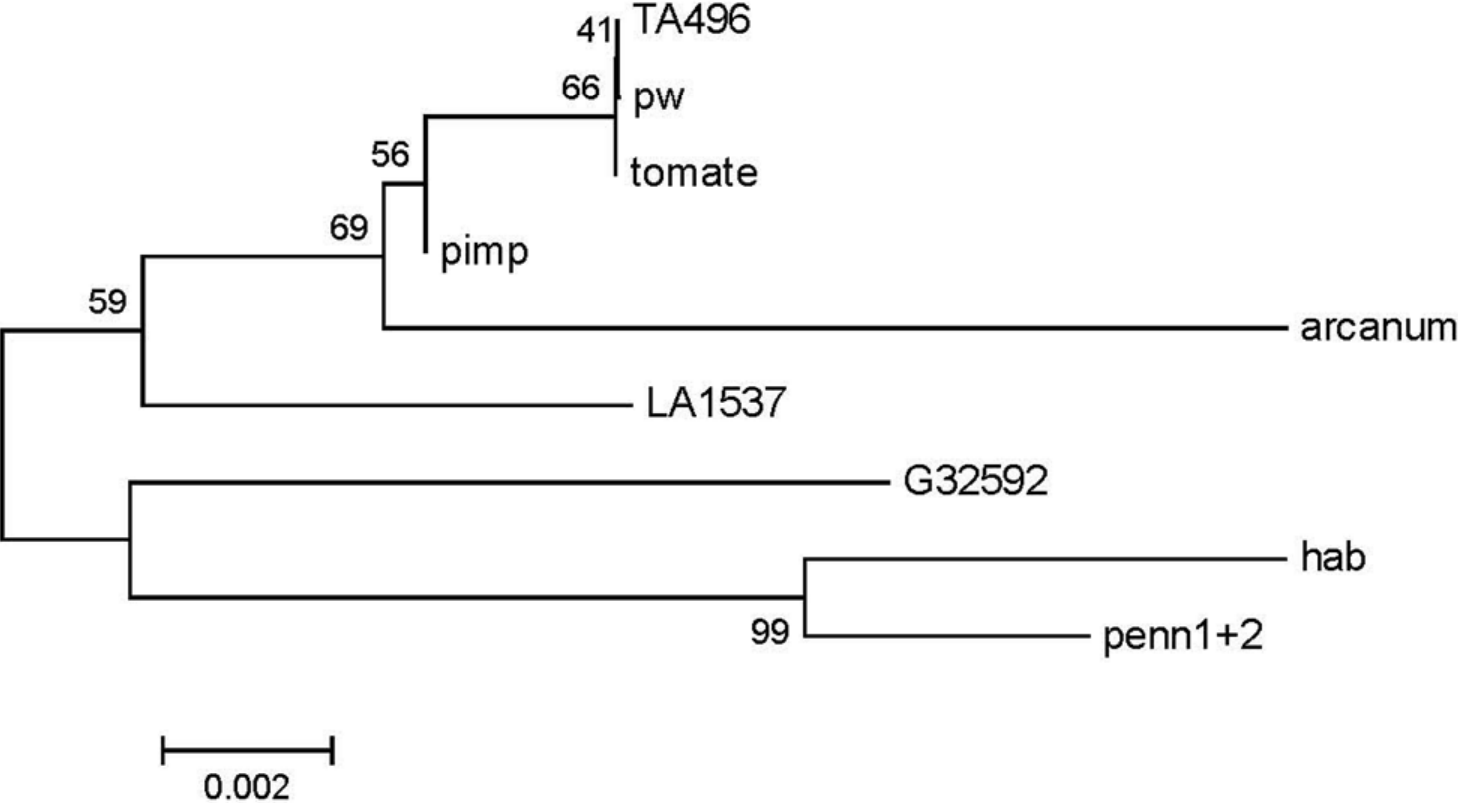

H<sub>1.0</sub>

LeSNP30  
2486\_1

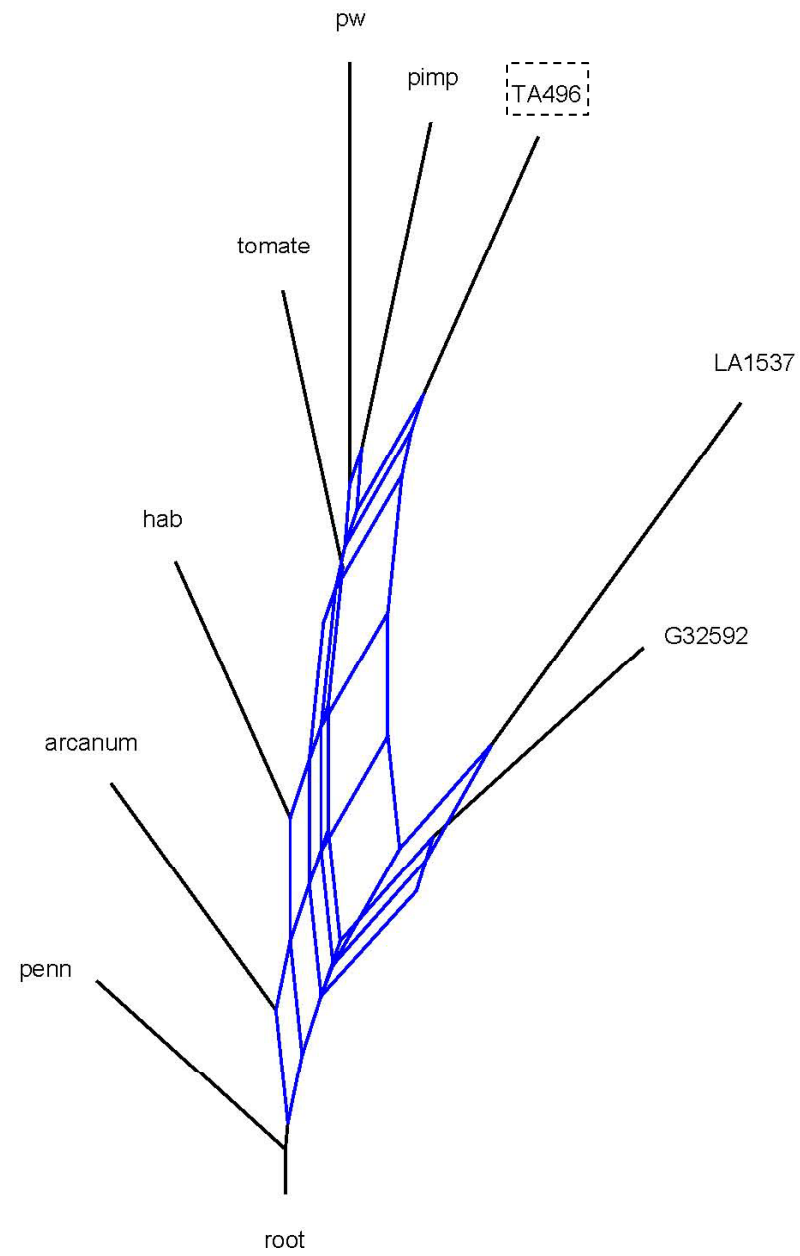



H0.1

LeSNP9b  
2534\_1b

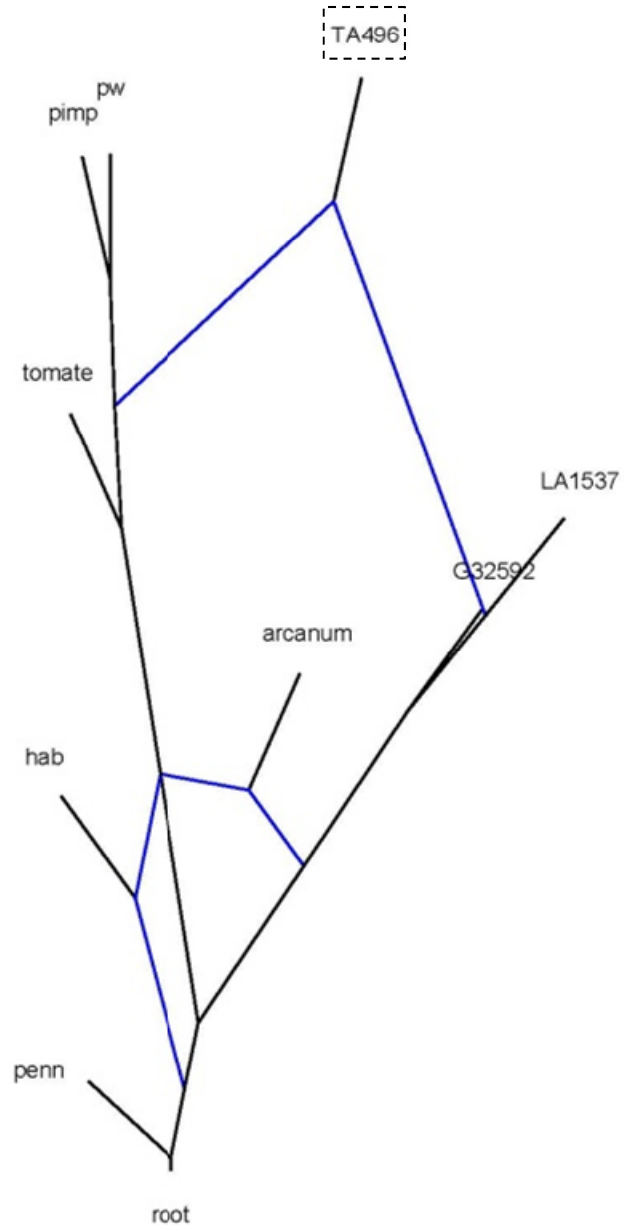

LeSNP25  
220\_1

H<sub>1.0</sub>

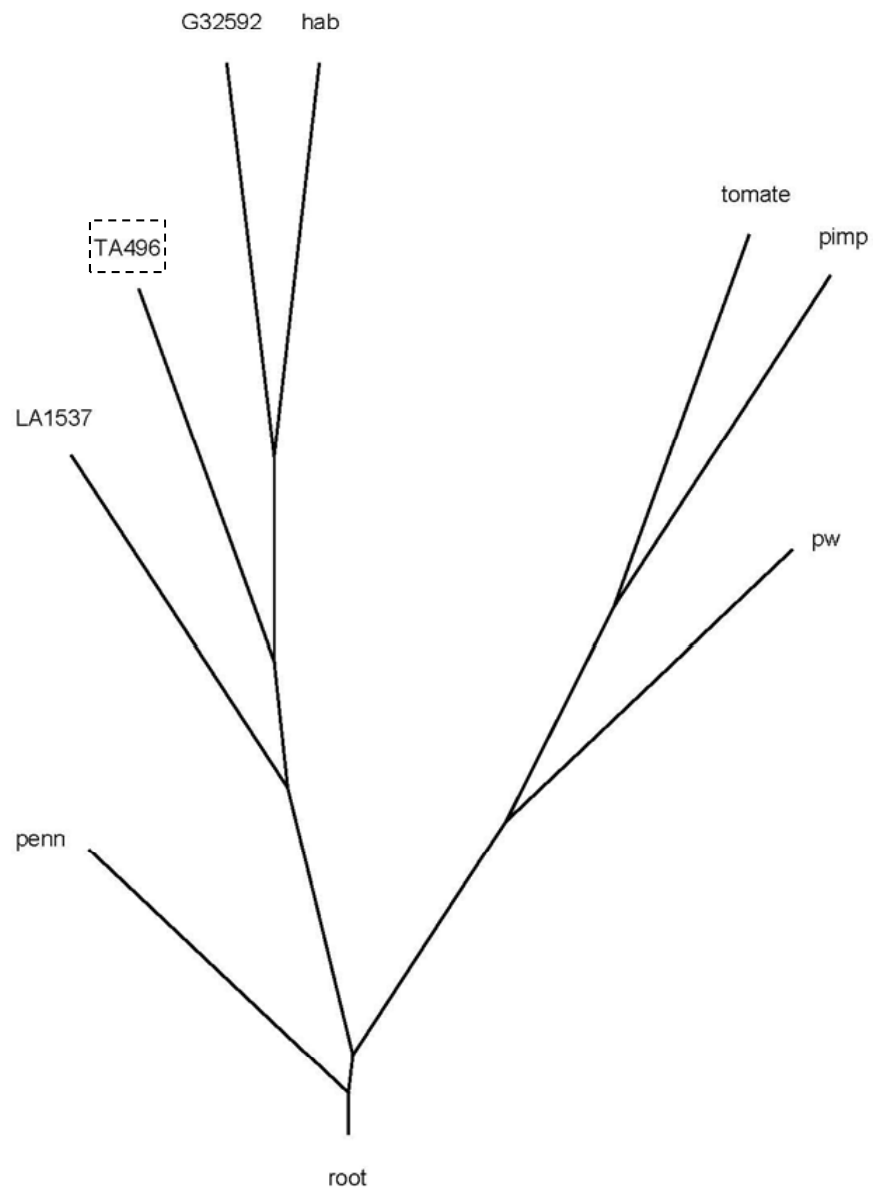

H<sub>1.0</sub>

LeSNP1  
437\_2

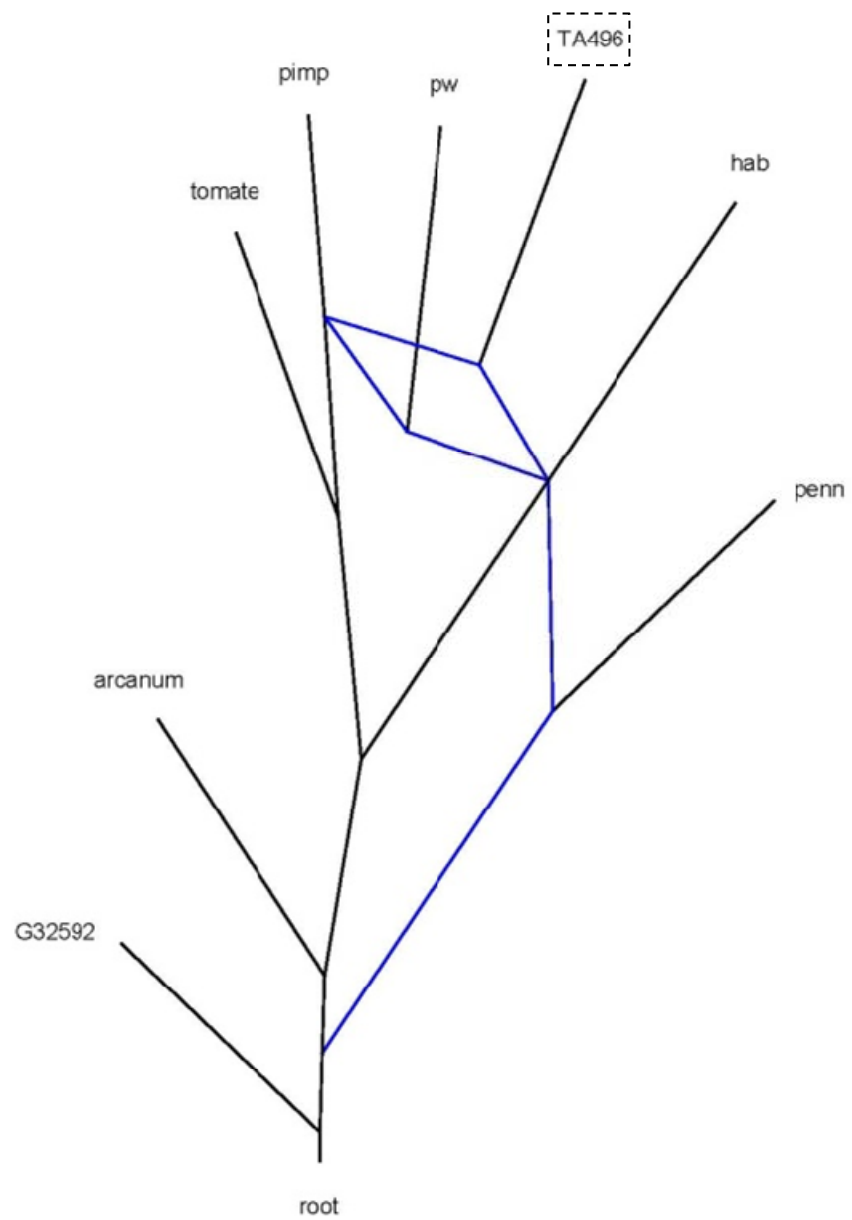

H<sub>1.0</sub>

LeSNP10  
2325\_3

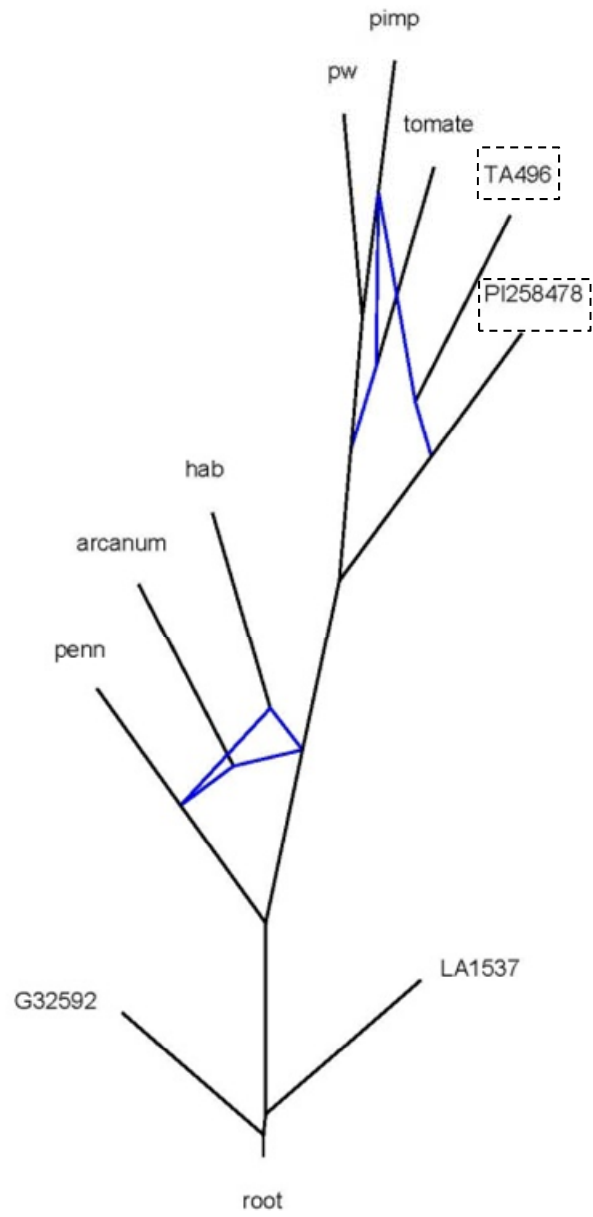

H1.0

COS7

C2\_At1g44575

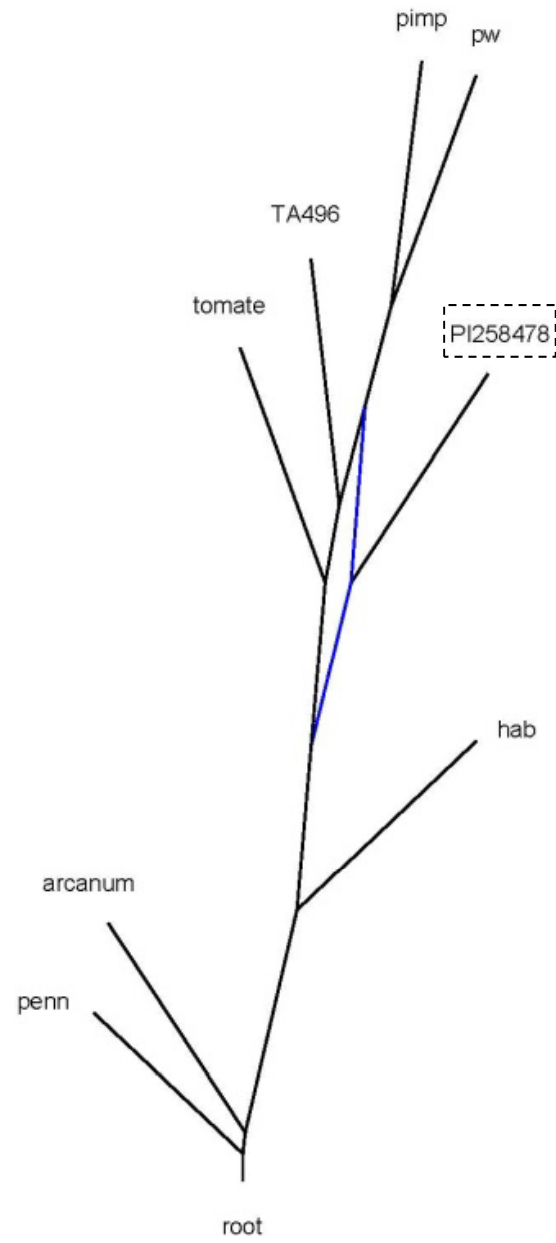

H<sub>1.0</sub>

LeSNP34  
2819\_5

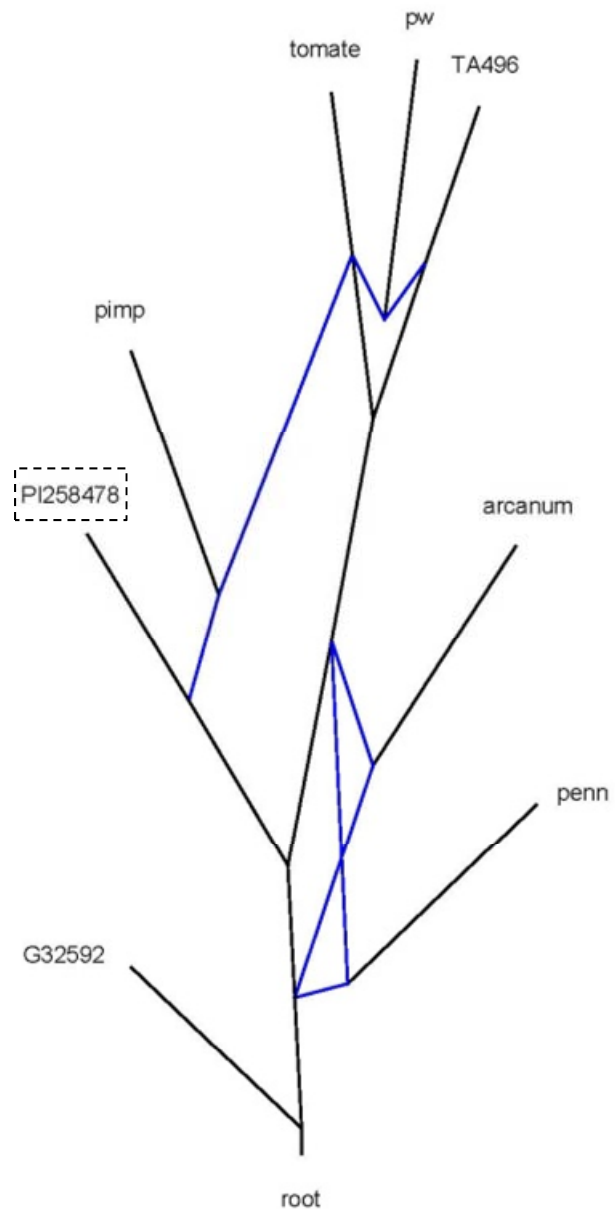

COS1  
U146140

H<sub>1.0</sub>

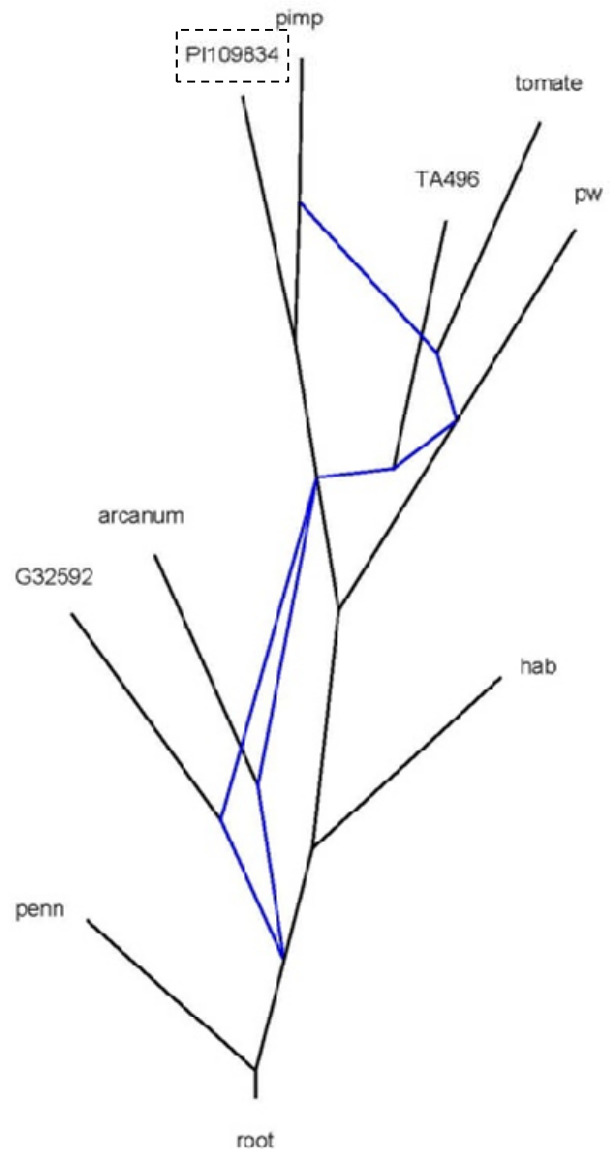

H<sub>1.0</sub>

COS10  
C2\_At1g73180

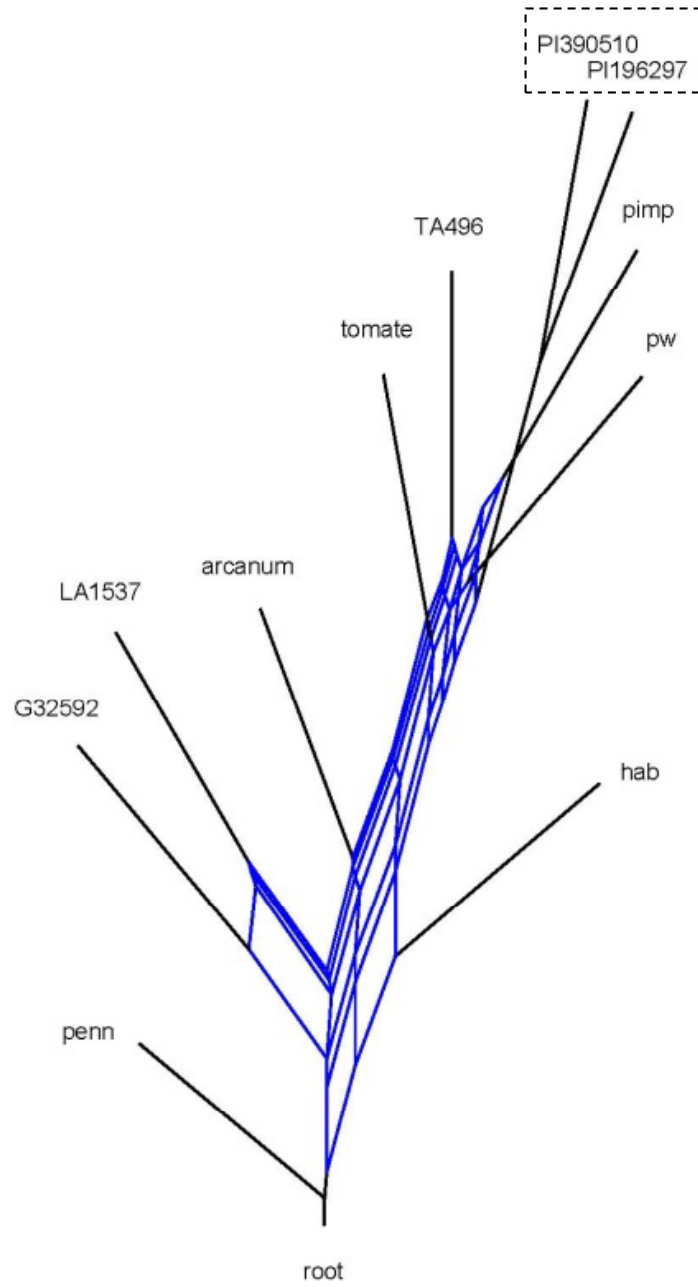

Supplement: 1471-2229-12-133-S2.pdf [file 1471-2229-12-133-S2.pdf]
